# Supplementary material
Source: ML conference proceedings conference paper supplement (https://openreview.net/forum?id=71ICQGB92Yz)
Supplement: supplementary_material [file attachment]

## A Convergence Analysis of Algorithm 1

First, we present the detailed statements Theorem 2.7.

**Theorem A.1.** *Let  $F(\mathbf{x}_0) - F(\mathbf{x}^*) \leq \Delta_F$ . Under Assumption 2.2, 2.3 and consider Algorithm 1 with momentum method for Hessian inverse approximation, with  $\eta_1 \leq \min \left\{ \frac{\mu_f}{L_f^2}, \frac{1}{\mu_f}, \frac{4m}{\mu_f |I_t|}, \frac{B\epsilon^2}{96C_1\mu_f\sigma^2} \right\}$ ,  $\eta_2 \leq \min \left\{ \frac{\mu_g}{L_g^2}, \frac{2m}{|I_t|\mu_g}, \frac{\mu_g B\epsilon^2}{48C_2\sigma^2} \right\}$ ,  $\beta_1 \leq \min \left\{ 1, \frac{B\epsilon^2}{96C_3\sigma^2} \right\}$ ,  $\beta_0 \leq \frac{\min\{|I_t|, B\}\epsilon^2}{12C_4}$ ,  $\eta_0 \leq \min \left\{ \frac{1}{2L_f f}, \frac{\beta_0}{\sqrt{80}L_F}, \frac{\eta_1\mu_f|I_t|}{\sqrt{640m}\sqrt{C_1C_\alpha}}, \frac{|I_t|\beta_1}{\sqrt{640m}\sqrt{C_3L_{gyy}}\sqrt{(1+C_y^2)}}, \frac{|I_t|\eta_2\mu_g}{\sqrt{160m}\sqrt{C_2C_y}} \right\}$ ,  $T \geq \max \left\{ \frac{30\Delta_F}{\eta_0\epsilon^2}, \frac{15\mathbb{E}[\|\nabla F(\mathbf{x}_0) - \mathbf{z}_1\|^2]}{\beta_0\epsilon^2}, \frac{60C_1\delta_{\alpha,0}}{\mu_f|I_t|\eta_1\epsilon^2}, \frac{30C_2\delta_{y,0}}{|I_t|\eta_2\mu_g\epsilon^2}, \frac{60C_3\delta_{gyy,0}}{|I_t|\beta_1\epsilon^2} \right\}$  we have*

$$\mathbb{E}[\|\nabla F(\mathbf{x}_\tau)\|^2] \leq \epsilon^2, \quad \mathbb{E}[\|\nabla F(\mathbf{x}_\tau) - \mathbf{z}_{\tau+1}\|^2] < 2\epsilon^2,$$

where  $\tau$  is randomly sampled from  $\{0, \dots, T\}$ ,  $C_1, C_2, C_3, C_4$  are constants defined in the proof, and  $L_F$  is the Lipschitz continuity constant of  $\nabla F(\mathbf{x})$ .

To prove Theorem A.1, we need the following Lemmas.

**Lemma A.2.** *Under Assumption 2.2 and 2.3,  $F(x)$  is  $L_F$ -smooth for some constant  $L_F \in \mathbb{R}$ .*

**Lemma A.3.** *Consider the update  $\mathbf{x}_{t+1} = \mathbf{x}_t - \eta_0 \mathbf{z}_{t+1}$ . Then under Assumption 2.2, with  $\eta_0 L_F \leq \frac{1}{2}$ , we have*

$$F(\mathbf{x}_{t+1}) \leq F(\mathbf{x}_t) + \frac{\eta_0}{2} \|\nabla F(\mathbf{x}_t) - \mathbf{z}_{t+1}\|^2 - \frac{\eta_0}{2} \|\nabla F(\mathbf{x}_t)\|^2 - \frac{\eta_0}{4} \|\mathbf{z}_{t+1}\|^2.$$

**Lemma A.4.** [Lemma 4.3 [25]] *Under Assumption 2.2,  $\mathbf{y}_i(\mathbf{x})$  is  $C_y = L_g/\mu_g$ -Lipschitz-continuous for all  $i$ . Define  $\alpha_i(\mathbf{x}, \mathbf{y}_i) := \arg \max_{\alpha_i \in \mathcal{A}} f_i(\mathbf{x}, \alpha_i, \mathbf{y}_i)$ . Then  $\alpha_i(\mathbf{x}, \mathbf{y})$  is  $C_\alpha = L_f/\mu_f$ -Lipschitz continuous.*

*Proof of Theorem A.1.* First, recall and define the following notations

$$\nabla F(\mathbf{x}_t) = \frac{1}{m} \sum_{i \in \mathcal{S}} \nabla_x f_i(\mathbf{x}_t, \alpha_i(\mathbf{x}_t), \mathbf{y}_i(\mathbf{x}_t)) - \nabla_{xy}^2 g_i(\mathbf{x}_t, \mathbf{y}_i(\mathbf{x}_t)) [\nabla_{yy}^2 g_i(\mathbf{x}_t, \mathbf{y}_i(\mathbf{x}_t))]^{-1} \nabla_y f_i(\mathbf{x}_t, \alpha_i(\mathbf{x}_t), \mathbf{y}_i(\mathbf{x}_t))$$

$$\nabla F(\mathbf{x}_t, \boldsymbol{\alpha}^t, \mathbf{y}^t) := \frac{1}{m} \sum_{i \in \mathcal{S}} \nabla F_i(\mathbf{x}_t, \alpha_i^t, \mathbf{y}_i^t) := \nabla_x f_i(\mathbf{x}_t, \alpha_i^t, \mathbf{y}_i^t) - \nabla_{xy}^2 g_i(\mathbf{x}_t, \mathbf{y}_i^t) \mathbb{E}_t[H_i^t] \nabla_y f_i(\mathbf{x}_t, \alpha_i^t, \mathbf{y}_i^t)$$

$$\Delta^{t+1} = \frac{1}{|I_t|} \sum_{i \in I_t} \Delta_i^{t+1} := \nabla_x f_i(\mathbf{x}_t, \alpha_i^t, \mathbf{y}_i^t; \mathcal{B}_i^t) - \nabla_{xy}^2 g_i(\mathbf{x}_t, \mathbf{y}_i^t; \tilde{\mathcal{B}}_i^t) H_i^t \nabla_y f_i(\mathbf{x}_t, \alpha_i^t, \mathbf{y}_i^t; \mathcal{B}_i^t)$$

Consider the update  $\mathbf{z}_{t+1} = (1 - \beta_0)\mathbf{z}_t + \beta_0\Delta^{t+1}$  in Algorithm 1, we have

$$\begin{aligned} & \mathbb{E}_t[\|\nabla F(\mathbf{x}_t) - \mathbf{z}_{t+1}\|^2] \\ &= \mathbb{E}_t[\|\nabla F(\mathbf{x}_t) - (1 - \beta_0)\mathbf{z}_t - \beta_0\Delta^{t+1}\|^2] \\ &= \mathbb{E}_t[\|(1 - \beta_0)(\nabla F(\mathbf{x}_{t-1}) - \mathbf{z}_t) + (1 - \beta_0)(\nabla F(\mathbf{x}_t) - \nabla F(\mathbf{x}_{t-1})) + \beta_0(\nabla F(\mathbf{x}_t) - \nabla F(\mathbf{x}_t, \boldsymbol{\alpha}^t, \mathbf{y}^t)) \\ &\quad + \beta_0(\nabla F(\mathbf{x}_t, \boldsymbol{\alpha}^t, \mathbf{y}^t) - \Delta^{t+1})\|^2] \\ &\stackrel{(a)}{=} \|(1 - \beta_0)(\nabla F(\mathbf{x}_{t-1}) - \mathbf{z}_t) + (1 - \beta_0)(\nabla F(\mathbf{x}_t) - \nabla F(\mathbf{x}_{t-1})) + \beta_0(\nabla F(\mathbf{x}_t) - \nabla F(\mathbf{x}_t, \boldsymbol{\alpha}^t, \mathbf{y}^t))\|^2 \\ &\quad + \beta_0^2 \mathbb{E}_t[\|\nabla F(\mathbf{x}_t, \boldsymbol{\alpha}^t, \mathbf{y}^t) - \Delta^{t+1}\|^2] \\ &\stackrel{(b)}{\leq} (1 + \beta_0)(1 - \beta_0)^2 \|\nabla F(\mathbf{x}_{t-1}) - \mathbf{z}_t\|^2 + 2(1 + \frac{1}{\beta_0}) [\|\nabla F(\mathbf{x}_t) - \nabla F(\mathbf{x}_{t-1})\|^2 + \beta_0^2 \|\nabla F(\mathbf{x}_t) - \nabla F(\mathbf{x}_t, \boldsymbol{\alpha}^t, \mathbf{y}^t)\|^2] \\ &\quad + \beta_0^2 \mathbb{E}_t[\|\nabla F(\mathbf{x}_t, \boldsymbol{\alpha}^t, \mathbf{y}^t) - \Delta^{t+1}\|^2] \\ &\stackrel{(c)}{\leq} (1 - \beta_0) \|\nabla F(\mathbf{x}_{t-1}) - \mathbf{z}_t\|^2 + \frac{4L_F^2}{\beta_0} \|\mathbf{x}_t - \mathbf{x}_{t-1}\|^2 + 4\beta_0 \underbrace{\|\nabla F(\mathbf{x}_t) - \nabla F(\mathbf{x}_t, \boldsymbol{\alpha}^t, \mathbf{y}^t)\|^2}_{\text{a}} \\ &\quad + \beta_0^2 \underbrace{\mathbb{E}_t[\|\nabla F(\mathbf{x}_t, \boldsymbol{\alpha}^t, \mathbf{y}^t) - \Delta^{t+1}\|^2]}_{\text{b}} \end{aligned} \tag{4}$$

where (a) follows from  $\mathbb{E}_t[\nabla F(\mathbf{x}_t, \alpha^t, \mathbf{y}^t)] = \Delta^{t+1}$ , (b) is due to  $\|a + b\|^2 \leq (1 + \beta)\|a\|^2 + (1 + \frac{1}{\beta})\|b\|^2$ , and (c) uses the assumption  $\beta_0 \leq 1$  and Lemma A.2.

Furthermore, one may bound the last two terms in 4 as following

$$\begin{aligned}
\textcircled{a} &= \|\nabla F(\mathbf{x}_t) - \nabla F(\mathbf{x}_t, \alpha^t, \mathbf{y}^t)\|^2 \\
&= \left\| \frac{1}{m} \sum_{i \in \mathcal{S}} \nabla_x f_i(\mathbf{x}_t, \alpha_i(\mathbf{x}_t), \mathbf{y}_i(\mathbf{x}_t)) - \nabla_{xy}^2 g_i(\mathbf{x}_t, \mathbf{y}_i(\mathbf{x}_t)) [\nabla_{yy}^2 g_i(\mathbf{x}_t, \mathbf{y}_i(\mathbf{x}_t))]^{-1} \nabla_y f_i(\mathbf{x}_t, \alpha_i(\mathbf{x}_t), \mathbf{y}_i(\mathbf{x}_t)) \right. \\
&\quad \left. - \frac{1}{m} \sum_{i \in \mathcal{S}} \nabla_x f_i(\mathbf{x}_t, \alpha_i^t, \mathbf{y}_i^t) - \nabla_{xy}^2 g_i(\mathbf{x}_t, \mathbf{y}_i^t) \mathbb{E}_t[H_i^t] \nabla_y f_i(\mathbf{x}_t, \alpha_i^t, \mathbf{y}_i^t) \right\|^2 \\
&\leq \frac{1}{m} \sum_{i \in \mathcal{S}} 2 \|\nabla_x f_i(\mathbf{x}_t, \alpha_i(\mathbf{x}_t), \mathbf{y}_i(\mathbf{x}_t)) - \nabla_x f_i(\mathbf{x}_t, \alpha_i^t, \mathbf{y}_i^t)\|^2 \\
&\quad + 6 \|\nabla_{xy}^2 g_i(\mathbf{x}_t, \mathbf{y}_i^t) \mathbb{E}_t[H_i^t] \nabla_y f_i(\mathbf{x}_t, \alpha_i^t, \mathbf{y}_i^t) - \nabla_{xy}^2 g_i(\mathbf{x}_t, \mathbf{y}_i^t) [\nabla_{yy}^2 g_i(\mathbf{x}_t, \mathbf{y}_i(\mathbf{x}_t))]^{-1} \nabla_y f_i(\mathbf{x}_t, \alpha_i^t, \mathbf{y}_i^t)\|^2 \\
&\quad + 6 \|\nabla_{xy}^2 g_i(\mathbf{x}_t, \mathbf{y}_i^t) [\nabla_{yy}^2 g_i(\mathbf{x}_t, \mathbf{y}_i(\mathbf{x}_t))]^{-1} \nabla_y f_i(\mathbf{x}_t, \alpha_i^t, \mathbf{y}_i^t) - \nabla_{xy}^2 g_i(\mathbf{x}_t, \mathbf{y}_i(\mathbf{x}_t)) [\nabla_{yy}^2 g_i(\mathbf{x}_t, \mathbf{y}_i(\mathbf{x}_t))]^{-1} \nabla_y f_i(\mathbf{x}_t, \alpha_i^t, \mathbf{y}_i^t)\|^2 \\
&\quad + 6 \|\nabla_{xy}^2 g_i(\mathbf{x}_t, \mathbf{y}_i(\mathbf{x}_t)) [\nabla_{yy}^2 g_i(\mathbf{x}_t, \mathbf{y}_i(\mathbf{x}_t))]^{-1} \nabla_y f_i(\mathbf{x}_t, \alpha_i^t, \mathbf{y}_i^t) \\
&\quad - \nabla_{xy}^2 g_i(\mathbf{x}_t, \mathbf{y}_i(\mathbf{x}_t)) [\nabla_{yy}^2 g_i(\mathbf{x}_t, \mathbf{y}_i(\mathbf{x}_t))]^{-1} \nabla_y f_i(\mathbf{x}_t, \alpha_i(\mathbf{x}_t), \mathbf{y}_i(\mathbf{x}_t))\|^2 \\
&\leq \frac{1}{m} \sum_{i \in \mathcal{S}} 2L_f^2 [\|\alpha_i(\mathbf{x}_t) - \alpha_i^t\|^2 + \|\mathbf{y}_i(\mathbf{x}_t) - \mathbf{y}_i^t\|^2] + 6C_{gxy}^2 C_f^2 \|\mathbb{E}_t[H_i^t] - [\nabla_{yy}^2 g_i(\mathbf{x}_t, \mathbf{y}_i(\mathbf{x}_t))]^{-1}\|^2 \\
&\quad + \frac{6L_{gxy}^2 C_f^2}{\mu_g^2} \|\mathbf{y}_i^t - \mathbf{y}_i(\mathbf{x}_t)\|^2 + \frac{6C_{gxy}^2 L_f^2}{\mu_g^2} [\|\alpha_i^t - \alpha_i(\mathbf{x}_t)\|^2 + \|\mathbf{y}_i^t - \mathbf{y}_i(\mathbf{x}_t)\|^2] \\
&= \frac{1}{m} (2L_f^2 + \frac{6C_{gxy}^2 L_f^2}{\mu_g^2}) \|\alpha^t - \alpha(\mathbf{x}_t)\|^2 + \frac{1}{m} (2L_f^2 + \frac{6L_{gxy}^2 C_f^2}{\mu_g^2} + \frac{6C_{gxy}^2 L_f^2}{\mu_g^2}) \|\mathbf{y}^t - \mathbf{y}(\mathbf{x}_t)\|^2 \\
&\quad + \frac{6C_{gxy}^2 C_f^2}{m} \sum_{i \in \mathcal{S}} \|\mathbb{E}_t[H_i^t] - [\nabla_{yy}^2 g_i(\mathbf{x}_t, \mathbf{y}_i(\mathbf{x}_t))]^{-1}\|^2
\end{aligned}$$

$$\begin{aligned}
\textcircled{b} &= \mathbb{E}_t[\|\nabla F(\mathbf{x}_t, \alpha^t, \mathbf{y}^t) - \Delta^{t+1}\|^2] \\
&\leq \mathbb{E}_t \left[ 2 \left\| \frac{1}{m} \sum_{i \in \mathcal{S}} \nabla F_i(\mathbf{x}_t, \alpha_i^t, \mathbf{y}_i^t) - \frac{1}{|I_t|} \sum_{i \in I_t} \nabla F_i(\mathbf{x}_t, \alpha_i^t, \mathbf{y}_i^t) \right\|^2 + 2 \left\| \frac{1}{|I_t|} \sum_{i \in I_t} \nabla F_i(\mathbf{x}_t, \alpha_i^t, \mathbf{y}_i^t) - \frac{1}{|I_t|} \sum_{i \in I_t} \Delta_i^{t+1} \right\|^2 \right] \\
&\leq \frac{8B_F}{B} + \frac{2}{m} \sum_{i \in \mathcal{S}} \mathbb{E}_{\mathcal{B}_i^t} \left[ 2 \|\nabla_x f_i(\mathbf{x}_t, \alpha_i^t, \mathbf{y}_i^t) - \nabla_x f_i(\mathbf{x}_t, \alpha_i^t, \mathbf{y}_i^t; \mathcal{B}_i^t)\|^2 \right. \\
&\quad + 6 \|\nabla_{xy}^2 g_i(\mathbf{x}_t, \mathbf{y}_i^t) \mathbb{E}_t[H_i^t] \nabla_y f_i(\mathbf{x}_t, \alpha_i^t, \mathbf{y}_i^t) - \nabla_{xy}^2 g_i(\mathbf{x}_t, \mathbf{y}_i^t; \tilde{\mathcal{B}}_i^t) \mathbb{E}_t[H_i^t] \nabla_y f_i(\mathbf{x}_t, \alpha_i^t, \mathbf{y}_i^t)\|^2 \\
&\quad + 6 \|\nabla_{xy}^2 g_i(\mathbf{x}_t, \mathbf{y}_i^t; \tilde{\mathcal{B}}_i^t) \mathbb{E}_t[H_i^t] \nabla_y f_i(\mathbf{x}_t, \alpha_i^t, \mathbf{y}_i^t) - \nabla_{xy}^2 g_i(\mathbf{x}_t, \mathbf{y}_i^t; \tilde{\mathcal{B}}_i^t) H_i^t \nabla_y f_i(\mathbf{x}_t, \alpha_i^t, \mathbf{y}_i^t)\|^2 \\
&\quad \left. + 6 \|\nabla_{xy}^2 g_i(\mathbf{x}_t, \mathbf{y}_i^t; \tilde{\mathcal{B}}_i^t) H_i^t \nabla_y f_i(\mathbf{x}_t, \alpha_i^t, \mathbf{y}_i^t) - \nabla_{xy}^2 g_i(\mathbf{x}_t, \mathbf{y}_i^t; \tilde{\mathcal{B}}_i^t) H_i^t \nabla_y f_i(\mathbf{x}_t, \alpha_i^t, \mathbf{y}_i^t; \mathcal{B}_i^t)\|^2 \right] \\
&\leq \frac{8B_F}{|I_t|} + \frac{4\sigma^2}{B} + \frac{12\sigma^2 C_f^2}{B} \|\mathbb{E}_t[H_i^t]\|^2 + 48(C_{gxy}^2 + \sigma^2) \|\mathbb{E}_t[H_i^t] - H_i^t\|^2 C_f^2 + \frac{12(C_{gxy}^2 + \sigma^2)\sigma^2}{B} \|H_i^t\|^2
\end{aligned}$$

where  $B_F = 2C_f^2 + \frac{2C_{gxy}^2 C_f^2}{\mu_g^2}$  is the upper bound of  $\|\nabla F_i(\mathbf{x}, \alpha_i, \mathbf{y}_i)\|^2$ .

Since  $H_i^t$  is irrelevant to the randomness at the  $t$ -th iteration, we have  $\mathbb{E}_t[H_i^t] = H_i^t$ . Thus

$$\begin{aligned}
\textcircled{a} &\leq \frac{1}{m}(2L_f^2 + \frac{6C_{gxy}^2 L_f^2}{\mu_g^2}) \|\alpha^t - \alpha(\mathbf{x}_t)\|^2 + \frac{1}{m}(2L_f^2 + \frac{6L_{gxy}^2 C_f^2}{\mu_g^2} + \frac{6C_{gxy}^2 L_f^2}{\mu_g^2}) \|\mathbf{y}^t - \mathbf{y}(\mathbf{x}_t)\|^2 \\
&\quad + \frac{6C_{gxy}^2 C_f^2}{m} \sum_{i \in \mathcal{S}} \|H_i^t - [\nabla_{yy}^2 g_i(\mathbf{x}_t, \mathbf{y}_i(\mathbf{x}_t))]^{-1}\|^2 \\
&\leq \frac{1}{m}(2L_f^2 + \frac{6C_{gxy}^2 L_f^2}{\mu_g^2}) \|\alpha^t - \alpha(\mathbf{x}_t)\|^2 + \frac{1}{m}(2L_f^2 + \frac{6L_{gxy}^2 C_f^2}{\mu_g^2} + \frac{6C_{gxy}^2 L_f^2}{\mu_g^2}) \|\mathbf{y}^t - \mathbf{y}(\mathbf{x}_t)\|^2 \\
&\quad + \frac{6C_{gxy}^2 C_f^2}{\mu_g^4 m} \sum_{i \in \mathcal{S}} \|s_i^t - \nabla_{yy}^2 g_i(\mathbf{x}_t, \mathbf{y}_i(\mathbf{x}_t))\|^2 \\
&=: \frac{C_1}{4m} \|\alpha^t - \alpha(\mathbf{x}_t)\|^2 + \frac{\tilde{C}_2}{4m} \|\mathbf{y}^t - \mathbf{y}(\mathbf{x}_t)\|^2 + \frac{C_3}{4m} \|s_i^t - \nabla_{yy}^2 g(\mathbf{x}_t, \mathbf{y}(\mathbf{x}_t))\|^2
\end{aligned} \tag{5}$$

and

$$\textcircled{b} \leq \frac{8B_F}{|I_t|} + \frac{4\sigma^2}{B} + \frac{12\sigma^2 C_f^2}{B\mu_g^2} + \frac{12(C_{gxy}^2 + \sigma^2)\sigma^2}{B\mu_g^2} =: \frac{C_4}{\min\{|I_t|, B\}} \tag{6}$$

Thus, combining inequalities 4, 5 and 6, we have

$$\begin{aligned}
\mathbb{E}_t[\|\nabla F(\mathbf{x}_t) - \mathbf{z}_{t+1}\|^2] &\leq (1 - \beta_0) \|\nabla F(\mathbf{x}_{t-1}) - \mathbf{z}_t\|^2 + \frac{4L_F^2 \eta_0^2}{\beta_0} \|\mathbf{z}_t\|^2 + 4\beta_0 \left[ \frac{C_1}{4m} \|\alpha^t - \alpha(\mathbf{x}_t)\|^2 \right. \\
&\quad \left. + \frac{\tilde{C}_2}{4m} \|\mathbf{y}^t - \mathbf{y}(\mathbf{x}_t)\|^2 + \frac{C_3}{4m} \|s^t - \nabla_{yy}^2 g(\mathbf{x}_t, \mathbf{y}(\mathbf{x}_t))\|^2 \right] + \frac{C_4 \beta_0^2}{\min\{|I_t|, B\}}
\end{aligned} \tag{7}$$

For simplicity, denote  $\delta_{\alpha,t} := \|\alpha^t - \alpha(\mathbf{x}_t)\|^2$ ,  $\delta_{y,t} := \|\mathbf{y}^t - \mathbf{y}(\mathbf{x}_t)\|^2$  and  $\delta_{g_{yy},t} := \|s^t - \nabla_{yy}^2 g(\mathbf{x}_t, \mathbf{y}(\mathbf{x}_t))\|^2$ . Take expectation over all randomness and summation over  $t = 1, \dots, T$  to get

$$\begin{aligned}
\sum_{t=0}^T \mathbb{E}[\|\nabla F(\mathbf{x}_t) - \mathbf{z}_{t+1}\|^2] &\leq \frac{1}{\beta_0} \mathbb{E}[\|\nabla F(\mathbf{x}_0) - \mathbf{z}_1\|^2] + \frac{4L_F^2 \eta_0^2}{\beta_0^2} \sum_{t=1}^T \mathbb{E}[\|\mathbf{z}_t\|^2] + \frac{C_1}{m} \sum_{t=1}^T \mathbb{E}[\delta_{\alpha,t}] \\
&\quad + \frac{\tilde{C}_2}{m} \sum_{t=1}^T \mathbb{E}[\delta_{y,t}] + \frac{C_3}{m} \sum_{t=1}^T \mathbb{E}[\delta_{g_{yy},t}] + \frac{C_4 \beta_0 T}{\min\{|I_t|, B\}}
\end{aligned} \tag{8}$$

Recall that from Lemma 2.5, Lemma 2.4 and Lemma 2, we have

$$\sum_{t=0}^T \mathbb{E}[\delta_{\alpha,t}] \leq \frac{4m}{\mu_f |I_t| \eta_1} \delta_{\alpha,0} + \frac{24L_f^2}{\mu_f^2} \sum_{t=0}^{T-1} \mathbb{E}[\delta_{y,t}] + \frac{8m\mu_f \eta_1 \sigma^2 T}{B} + \frac{32m^3 C_\alpha^2 \eta_0^2}{\eta_1^2 \mu_f^2 |I_t|^2} \sum_{t=0}^{T-1} \mathbb{E}[\|\mathbf{z}_{t+1}\|^2] \tag{9}$$

$$\sum_{t=0}^T \mathbb{E}[\delta_{y,t}] \leq \frac{2m}{|I_t| \eta_2 \mu_g} \delta_{y,0} + \frac{4m\eta_2 T \sigma^2}{\mu_g B} + \frac{8m^3 C_y^2 \eta_0^2}{|I_t|^2 \eta_2^2 \mu_g^2} \sum_{t=0}^{T-1} \mathbb{E}[\|\mathbf{z}_{t+1}\|^2] \tag{10}$$

$$\sum_{t=0}^T \mathbb{E}[\delta_{g_{yy},t}] \leq \frac{4m}{|I_t| \beta_1} \delta_{g_{yy},0} + 32L_{g_{yy}}^2 \sum_{t=0}^{T-1} \mathbb{E}[\delta_{y,t}] + 8m\beta_1 T \frac{\sigma^2}{B} + \frac{32m^3 L_{g_{yy}}^2 (1 + C_y^2) \eta_0^2}{|I_t|^2 \beta_1^2} \sum_{t=0}^{T-1} \mathbb{E}[\|\mathbf{z}_{t+1}\|^2] \tag{11}$$

Combining inequalities 8, 9, 10 and 11, we obtain

$$\begin{aligned}
& \sum_{t=0}^T \mathbb{E}[\|\nabla F(\mathbf{x}_t) - \mathbf{z}_{t+1}\|^2] \\
& \leq \frac{1}{\beta_0} \mathbb{E}[\|\nabla F(\mathbf{x}_0) - \mathbf{z}_1\|^2] + \frac{4L_F^2\eta_0^2}{\beta_0^2} \sum_{t=1}^T \mathbb{E}[\|\mathbf{z}_t\|^2] + \frac{C_1}{m} \left[ \frac{4m}{\mu_f|I_t|\eta_1} \delta_{\alpha,0} + \frac{8m\mu_f\eta_1\sigma^2 T}{B} + \frac{32m^3 C_\alpha^2 \eta_0^2}{\eta_1^2 \mu_f^2 |I_t|^2} \sum_{t=0}^{T-1} \mathbb{E}[\|\mathbf{z}_{t+1}\|^2] \right] \\
& \quad + \frac{C_2}{m} \sum_{t=1}^T \mathbb{E}[\delta_{y,t}] + \frac{C_3}{m} \left[ \frac{4m}{|I_t|\beta_1} \delta_{g_{yy},0} + 8m\beta_1 T \frac{\sigma^2}{B} + \frac{32m^3 L_{g_{yy}}^2 (1 + C_y^2) \eta_0^2}{|I_t|^2 \beta_1^2} \sum_{t=0}^{T-1} \mathbb{E}[\|\mathbf{z}_{t+1}\|^2] \right] + \frac{C_4 \beta_0 T}{\min\{|I_t|, B\}} \\
& \leq \frac{\mathbb{E}[\|\nabla F(\mathbf{x}_0) - \mathbf{z}_1\|^2]}{\beta_0} + \frac{4C_1 \delta_{\alpha,0}}{\mu_f |I_t| \eta_1} + \frac{8C_1 \mu_f \eta_1 \sigma^2 T}{B} + \frac{2C_2 \delta_{y,0}}{|I_t| \eta_2 \mu_g} + \frac{4C_2 \eta_2 T \sigma^2}{\mu_g B} + \frac{4C_3 \delta_{g_{yy},0}}{|I_t| \beta_1} + 8C_3 \beta_1 T \frac{\sigma^2}{B} \\
& \quad + \frac{C_4 \beta_0 T}{\min\{|I_t|, B\}} + \left( \frac{4L_F^2 \eta_0^2}{\beta_0^2} + \frac{32m^2 C_1 C_\alpha^2 \eta_0^2}{\eta_1^2 \mu_f^2 |I_t|^2} + \frac{32m^2 C_3 L_{g_{yy}}^2 (1 + C_y^2) \eta_0^2}{|I_t|^2 \beta_1^2} + \frac{8m^2 C_2 C_y^2 \eta_0^2}{|I_t|^2 \eta_2^2 \mu_g^2} \right) \sum_{t=1}^T \mathbb{E}[\|\mathbf{z}_t\|^2] \tag{12}
\end{aligned}$$

where  $C_2 := \frac{24L_F^2 C_1}{\mu_f^2} + \tilde{C}_2 + 32L_{g_{yy}}^2 C_3$ .

Recall Lemma A.3, we have

$$F(\mathbf{x}_{t+1}) \leq F(\mathbf{x}_t) + \frac{\eta_x}{2} \|\nabla F(\mathbf{x}_t) - \mathbf{z}_{t+1}\|^2 - \frac{\eta_0}{2} \|\nabla F(\mathbf{x}_t)\|^2 - \frac{\eta_0}{4} \|\mathbf{z}_{t+1}\|^2$$

Combining with 12, we obtain

$$\begin{aligned}
& \frac{1}{T+1} \sum_{t=0}^T \mathbb{E}[\|\nabla F(\mathbf{x}_t)\|^2] \\
& \leq \frac{2\mathbb{E}[F(\mathbf{x}_0) - F(\mathbf{x}_{T+1})]}{\eta_0 T} + \frac{1}{T} \sum_{t=0}^T \mathbb{E}[\|\nabla F(\mathbf{x}_t) - \mathbf{z}_{t+1}\|^2] - \frac{1}{2T} \sum_{t=0}^T \mathbb{E}[\|\mathbf{z}_{t+1}\|^2] \\
& \leq \frac{1}{T} \left[ \frac{2\mathbb{E}[F(\mathbf{x}_0) - F(\mathbf{x}^*)]}{\eta_0} + \frac{\mathbb{E}[\|\nabla F(\mathbf{x}_0) - \mathbf{z}_1\|^2]}{\beta_0} + \frac{4C_1 \delta_{\alpha,0}}{\mu_f |I_t| \eta_1} + \frac{2C_2 \delta_{y,0}}{|I_t| \eta_2 \mu_g} + \frac{4C_3 \delta_{g_{yy},0}}{|I_t| \beta_1} \right] \\
& \quad + \frac{8C_1 \mu_f \eta_1 \sigma^2}{B} + \frac{4C_2 \eta_2 \sigma^2}{\mu_g B} + 8C_3 \beta_1 \frac{\sigma^2}{B} + \frac{C_4 \beta_0}{\min\{|I_t|, B\}} \\
& \quad + \frac{1}{T} \left( \frac{4L_F^2 \eta_0^2}{\beta_0^2} + \frac{32m^2 C_1 C_\alpha^2 \eta_0^2}{\eta_1^2 \mu_f^2 |I_t|^2} + \frac{32m^2 C_3 L_{g_{yy}}^2 (1 + C_y^2) \eta_0^2}{|I_t|^2 \beta_1^2} + \frac{8m^2 C_2 C_y^2 \eta_0^2}{|I_t|^2 \eta_2^2 \mu_g^2} - \frac{1}{2} \right) \sum_{t=1}^T \mathbb{E}[\|\mathbf{z}_t\|^2] \tag{13}
\end{aligned}$$

By setting

$$\eta_0^2 \leq \min \left\{ \frac{\beta_0^2}{80L_F^2}, \frac{\eta_1^2 \mu_f^2 |I_t|^2}{640m^2 C_1 C_\alpha^2}, \frac{|I_t|^2 \beta_1^2}{640m^2 C_3 L_{g_{yy}}^2 (1 + C_y^2)}, \frac{|I_t|^2 \eta_2^2 \mu_g^2}{160m^2 C_2 C_y^2} \right\}$$

we have

$$\frac{4L_F^2 \eta_0^2}{\beta_0^2} + \frac{32m^2 C_1 C_\alpha^2 \eta_0^2}{\eta_1^2 \mu_f^2 |I_t|^2} + \frac{32m^2 C_3 L_{g_{yy}}^2 (1 + C_y^2) \eta_0^2}{|I_t|^2 \beta_1^2} + \frac{8m^2 C_2 C_y^2 \eta_0^2}{|I_t|^2 \eta_2^2 \mu_g^2} - \frac{1}{4} \leq 0$$

which implies that the last term of the right hand side of inequality 13 is less or equal to zero. Hence

$$\begin{aligned}
& \frac{1}{T+1} \sum_{t=0}^T \mathbb{E}[\|\nabla F(\mathbf{x}_t)\|^2] \\
& \leq \frac{1}{T} \left[ \frac{2\mathbb{E}[F(\mathbf{x}_0) - F(\mathbf{x}^*)]}{\eta_0} + \frac{\mathbb{E}[\|\nabla F(\mathbf{x}_0) - \mathbf{z}_1\|^2]}{\beta_0} + \frac{4C_1 \delta_{\alpha,0}}{\mu_f |I_t| \eta_1} + \frac{2C_2 \delta_{y,0}}{|I_t| \eta_2 \mu_g} + \frac{4C_3 \delta_{g_{yy},0}}{|I_t| \beta_1} \right] \tag{14} \\
& \quad + \frac{8C_1 \mu_f \eta_1 \sigma^2}{B} + \frac{4C_2 \eta_2 \sigma^2}{\mu_g B} + 8C_3 \beta_1 \frac{\sigma^2}{B} + \frac{C_4 \beta_0}{\min\{|I_t|, B\}}
\end{aligned}$$

With

$$\eta_1 \leq \frac{B\epsilon^2}{96C_1\mu_f\sigma^2}, \eta_2 \leq \frac{\mu_g B\epsilon^2}{48C_2\sigma^2}, \beta_1 \leq \frac{B\epsilon^2}{96C_3\sigma^2}, \beta_0 \leq \frac{\min\{|I_t|, B\}\epsilon^2}{12C_4}$$

$$T \geq \max \left\{ \frac{30\mathbb{E}[F(\mathbf{x}_0) - F(\mathbf{x}^*)]}{\eta_0\epsilon^2}, \frac{15\mathbb{E}[\|\nabla F(\mathbf{x}_0) - \mathbf{z}_1\|^2]}{\beta_0\epsilon^2}, \frac{60C_1\delta_{\alpha,0}}{\mu_f|I_t|\eta_1\epsilon^2}, \frac{30C_2\delta_{y,0}}{|I_t|\eta_2\mu_g\epsilon^2}, \frac{60C_3\delta_{g_{yy},0}}{|I_t|\beta_1\epsilon^2} \right\}$$

we have

$$\frac{1}{T+1} \sum_{t=0}^T \mathbb{E}[\|\nabla F(\mathbf{x}_t)\|^2] \leq \frac{\epsilon^2}{3} + \frac{\epsilon^2}{3} < \epsilon^2$$

Furthermore, to show the second part of the theorem, following from inequality 12, we have

$$\begin{aligned} & \sum_{t=0}^T \mathbb{E}[\|\nabla F(\mathbf{x}_t) - \mathbf{z}_{t+1}\|^2] \\ & \leq \frac{\mathbb{E}[\|\nabla F(\mathbf{x}_0) - \mathbf{z}_1\|^2]}{\beta_0} + \frac{4C_1\delta_{\alpha,0}}{\mu_f|I_t|\eta_1} + \frac{8C_1\mu_f\eta_1\sigma^2T}{B} + \frac{2C_2\delta_{y,0}}{|I_t|\eta_2\mu_g} + \frac{4C_2\eta_2T\sigma^2}{\mu_gB} + \frac{4C_3\delta_{g_{yy},0}}{|I_t|\beta_1} \\ & \quad + 8C_3\beta_1T\frac{\sigma^2}{B} + \frac{C_4\beta_0T}{\min\{|I_t|, B\}} + \frac{1}{2} \sum_{t=0}^{T-1} \mathbb{E}[\|\nabla F(\mathbf{x}_t)\|^2] + \mathbb{E}[\|\nabla F(\mathbf{x}_t) - \mathbf{z}_{t+1}\|^2] \end{aligned} \tag{15}$$

With parameter set above, we have

$$\frac{1}{T+1} \sum_{t=0}^T \mathbb{E}[\|\nabla F(\mathbf{x}_t) - \mathbf{z}_{t+1}\|^2] < 2\epsilon^2$$

□

### A.1 Proof of Lemma A.2

*Proof.* Take arbitrary  $\mathbf{x}_1, \mathbf{x}_2$ . Then with Assumption 2.2 and Lemma A.4 we have

$$\begin{aligned} & \|\nabla F(\mathbf{x}_1) - \nabla F(\mathbf{x}_2)\|^2 \\ & \leq \left\| \frac{1}{m} \sum_{i \in \mathcal{S}} \nabla_x f_i(\mathbf{x}_1, \alpha_i(\mathbf{x}_1), \mathbf{y}_i(\mathbf{x}_1)) - \nabla_{xy}^2 g_i(\mathbf{x}_1, \mathbf{y}_i(\mathbf{x}_1)) [\nabla_{yy}^2 g_i(\mathbf{x}_1, \mathbf{y}_i(\mathbf{x}_1))]^{-1} \nabla_y f_i(\mathbf{x}_1, \alpha_i(\mathbf{x}_1), \mathbf{y}_i(\mathbf{x}_1)) \right. \\ & \quad \left. - \frac{1}{m} \sum_{i \in \mathcal{S}} \nabla_x f_i(\mathbf{x}_2, \alpha_i(\mathbf{x}_2), \mathbf{y}_i(\mathbf{x}_2)) - \nabla_{xy}^2 g_i(\mathbf{x}_2, \mathbf{y}_i(\mathbf{x}_2)) [\nabla_{yy}^2 g_i(\mathbf{x}_2, \mathbf{y}_i(\mathbf{x}_2))]^{-1} \nabla_y f_i(\mathbf{x}_2, \alpha_i(\mathbf{x}_2), \mathbf{y}_i(\mathbf{x}_2)) \right\|^2 \\ & \leq \left( 2L_f^2(1 + C_\alpha^2 + C_y^2) + \frac{6L_{gxy}^2(1 + C_y^2)C_f^2}{\mu_g^2} + \frac{6C_{gxy}^2L_{g_{yy}}^2(1 + C_y^2)C_f^2}{\mu_g^4} + \frac{6C_{gxy}^2L_f^2(1 + C_\alpha^2 + C_y^2)}{\mu_g^2} \right) \|\mathbf{x}_1 - \mathbf{x}_2\|^2 \\ & =: L_F^2 \|\mathbf{x}_1 - \mathbf{x}_2\|^2 \end{aligned}$$

□

### A.2 Proof of Lemma A.3

*Proof.* By  $L_F$ -smoothness of  $F(\mathbf{x})$ , with  $\eta_0 \leq \frac{1}{2L_F}$ , we have

$$\begin{aligned} F(\mathbf{x}_{t+1}) & \leq F(\mathbf{x}_t) + \nabla F(\mathbf{x}_t)^T (\mathbf{x}_{t+1} - \mathbf{x}_t) + \frac{L_F}{2} \|\mathbf{x}_{t+1} - \mathbf{x}_t\|^2 \\ & = F(\mathbf{x}_t) - \eta_0 \nabla F(\mathbf{x}_t)^T \mathbf{z}_{t+1} + \frac{L_F}{2} \eta_0^2 \|\mathbf{z}_{t+1}\|^2 \\ & = F(\mathbf{x}_t) + \frac{\eta_0}{2} \|\nabla F(\mathbf{x}_t) - \mathbf{z}_{t+1}\|^2 - \frac{\eta_0}{2} \|\nabla F(\mathbf{x}_t)\|^2 + \left( \frac{L_F}{2} \eta_0^2 - \frac{\eta_0}{2} \right) \|\mathbf{z}_{t+1}\|^2. \end{aligned}$$

□

### A.3 Proof of Lemma 2.4

This proof follows from the proof of Lemma 8 in [29].

### A.4 Proof of Lemma 2.5

*Proof.* Define  $\tilde{\alpha}_i^t := \Pi_{\mathcal{A}}[\alpha_i^t + \eta_1 \nabla_{\alpha} f_i(\mathbf{x}_t, \alpha_i^t, \mathbf{y}_i^t; \mathcal{B}_i^t)]$ . Note that  $\alpha_i(\mathbf{x}_t) = \arg \max_{\alpha \in \mathcal{A}} f_i(\mathbf{x}_t, \alpha, \mathbf{y}_i(\mathbf{x}_t))$ . Since  $\alpha_i(\mathbf{x}_t) = \Pi_{\mathcal{A}}[\alpha_i(\mathbf{x}_t) + \eta_1 \nabla_{\alpha} f_i(\mathbf{x}_t, \alpha_i(\mathbf{x}_t), \mathbf{y}_i(\mathbf{x}_t))]$ , take  $i \in \mathcal{S}$ , then

$$\begin{aligned}
& \mathbb{E}_t[\|\tilde{\alpha}_i^t - \alpha_i(\mathbf{x}_t)\|^2] \\
&= \mathbb{E}_t[\|\Pi_{\mathcal{A}}[\alpha_i^t + \eta_1 \nabla_{\alpha} f_i(\mathbf{x}_t, \alpha_i^t, \mathbf{y}_i^t; \mathcal{B}_i^t)] - \Pi_{\mathcal{A}}[\alpha_i(\mathbf{x}_t) + \eta_1 \nabla_{\alpha} f_i(\mathbf{x}_t, \alpha_i(\mathbf{x}_t), \mathbf{y}_i(\mathbf{x}_t))]\|^2] \\
&\leq \mathbb{E}_t[\|\alpha_i^t + \eta_1 \nabla_{\alpha} f_i(\mathbf{x}_t, \alpha_i^t, \mathbf{y}_i^t; \mathcal{B}_i^t) - [\alpha_i(\mathbf{x}_t) + \eta_1 \nabla_{\alpha} f_i(\mathbf{x}_t, \alpha_i(\mathbf{x}_t), \mathbf{y}_i(\mathbf{x}_t))]\|^2] \\
&= \mathbb{E}_t[\|\alpha_i^t - \alpha_i(\mathbf{x}_t) + \eta_1 \nabla_{\alpha} f_i(\mathbf{x}_t, \alpha_i^t, \mathbf{y}_i^t) - \eta_1 \nabla_{\alpha} f_i(\mathbf{x}_t, \alpha_i(\mathbf{x}_t), \mathbf{y}_i(\mathbf{x}_t)) \\
&\quad + \eta_1 \nabla_{\alpha} f_i(\mathbf{x}_t, \alpha_i^t, \mathbf{y}_i^t; \mathcal{B}_i^t) - \eta_1 \nabla_{\alpha} f_i(\mathbf{x}_t, \alpha_i^t, \mathbf{y}_i^t)\|^2] \\
&\leq \|\alpha_i^t - \alpha_i(\mathbf{x}_t) + \eta_1 \nabla_{\alpha} f_i(\mathbf{x}_t, \alpha_i^t, \mathbf{y}_i^t) - \eta_1 \nabla_{\alpha} f_i(\mathbf{x}_t, \alpha_i(\mathbf{x}_t), \mathbf{y}_i(\mathbf{x}_t))\|^2 + \frac{\eta_1^2 \sigma^2}{B} \\
&\leq \|\alpha_i^t - \alpha_i(\mathbf{x}_t)\|^2 + \eta_1^2 \|\nabla_{\alpha} f_i(\mathbf{x}_t, \alpha_i^t, \mathbf{y}_i^t) - \nabla_{\alpha} f_i(\mathbf{x}_t, \alpha_i(\mathbf{x}_t), \mathbf{y}_i(\mathbf{x}_t))\|^2 \\
&\quad + 2\eta_1 \langle \alpha_i^t - \alpha_i(\mathbf{x}_t), \nabla_{\alpha} f_i(\mathbf{x}_t, \alpha_i^t, \mathbf{y}_i^t) - \nabla_{\alpha} f_i(\mathbf{x}_t, \alpha_i(\mathbf{x}_t), \mathbf{y}_i(\mathbf{x}_t)) \rangle \\
&\quad + 2\eta_1 \langle \alpha_i^t - \alpha_i(\mathbf{x}_t), \nabla_{\alpha} f_i(\mathbf{x}_t, \alpha_i^t, \mathbf{y}_i^t) - \nabla_{\alpha} f_i(\mathbf{x}_t, \alpha_i^t, \mathbf{y}_i^t) \rangle + \frac{\eta_1^2 \sigma^2}{B} \\
&\stackrel{(a)}{\leq} \|\alpha_i^t - \alpha_i(\mathbf{x}_t)\|^2 + \eta_1^2 \|\nabla_{\alpha} f_i(\mathbf{x}_t, \alpha_i^t, \mathbf{y}_i^t) - \nabla_{\alpha} f_i(\mathbf{x}_t, \alpha_i(\mathbf{x}_t), \mathbf{y}_i(\mathbf{x}_t))\|^2 - 2\eta_1 \mu_f \|\alpha_i^t - \alpha_i(\mathbf{x}_t)\|^2 \\
&\quad + 2\eta_1 \left[ \frac{\mu_f}{4} \|\alpha_i^t - \alpha_i(\mathbf{x}_t)\|^2 + \frac{1}{\mu_f} \|\nabla_{\alpha} f_i(\mathbf{x}_t, \alpha_i^t, \mathbf{y}_i^t) - \nabla_{\alpha} f_i(\mathbf{x}_t, \alpha_i^t, \mathbf{y}_i^t)\|^2 \right] + \frac{\eta_1^2 \sigma^2}{B} \\
&\stackrel{(b)}{\leq} (1 - \frac{\eta_1 \mu_f}{2}) \|\alpha_i^t - \alpha_i(\mathbf{x}_t)\|^2 + \frac{3\eta_1 L_f^2}{\mu_f} \|\mathbf{y}_i^t - \mathbf{y}_i(\mathbf{x}_t)\|^2 + \frac{\eta_1^2 \sigma^2}{B}
\end{aligned} \tag{16}$$

where inequality (a) uses the standard inequality  $\langle a, b \rangle \leq \frac{\beta}{2} \|a\|^2 + \frac{1}{2\beta} \|b\|^2$  and the strong monotonicity of  $-f_i(\mathbf{x}_t, \cdot, \mathbf{y}_{i,t})$  as it is assumed to be  $\mu_f$ -strongly convex, and (b) uses the assumption  $\eta_1 \leq \min\{\mu_f/L_f^2, 1/\mu_f\}$ . Note that

$$\mathbb{E}_t[\|\alpha_i^{t+1} - \alpha_i(\mathbf{x}_t)\|^2] = \frac{|I_t|}{m} \mathbb{E}_t[\|\tilde{\alpha}_i^t - \alpha_i(\mathbf{x}_t)\|^2] + \frac{m - |I_t|}{m} \|\alpha_i^t - \alpha_i(\mathbf{x}_t)\|^2$$

which implies

$$\mathbb{E}_t[\|\tilde{\alpha}_i^t - \alpha_i(\mathbf{x}_t)\|^2] = \frac{m}{|I_t|} \mathbb{E}_t[\|\alpha_i^{t+1} - \alpha_i(\mathbf{x}_t)\|^2] - \frac{m - |I_t|}{|I_t|} \|\alpha_i^t - \alpha_i(\mathbf{x}_t)\|^2 \tag{17}$$

Thus combining inequalities 16 and 17 gives

$$\begin{aligned}
& \frac{m}{|I_t|} \mathbb{E}_t[\|\alpha_i^{t+1} - \alpha_i(\mathbf{x}_t)\|^2] - \frac{m - |I_t|}{|I_t|} \|\alpha_i^t - \alpha_i(\mathbf{x}_t)\|^2 \\
&\leq (1 - \frac{\eta_1 \mu_f}{2}) \|\alpha_i^t - \alpha_i(\mathbf{x}_t)\|^2 + \frac{3\eta_1 L_f^2}{\mu_f} \|\mathbf{y}_i^t - \mathbf{y}_i(\mathbf{x}_t)\|^2 + \frac{\eta_1^2 \sigma^2}{B}
\end{aligned} \tag{18}$$

Rearrange it to get

$$\mathbb{E}_t[\|\alpha_i^{t+1} - \alpha_i(\mathbf{x}_t)\|^2] \leq \left(1 - \frac{\eta_1 \mu_f |I_t|}{2m}\right) \|\alpha_i^t - \alpha_i(\mathbf{x}_t)\|^2 + \frac{3\eta_1 L_f^2 |I_t|}{\mu_f m} \|\mathbf{y}_i^t - \mathbf{y}_i(\mathbf{x}_t)\|^2 + \frac{\eta_1^2 \sigma^2 |I_t|}{mB} \tag{19}$$

Thus

$$\begin{aligned}
& \mathbb{E}_t[\|\alpha_i^{t+1} - \alpha_i(\mathbf{x}_{t+1})\|^2] \\
& \leq \left(1 + \frac{\eta_1 \mu_f |I_t|}{4m}\right) \mathbb{E}_t[\|\alpha_i^{t+1} - \alpha_i(\mathbf{x}_t)\|^2] + \left(1 + \frac{4m}{\eta_1 \mu_f |I_t|}\right) \mathbb{E}_t[\|\alpha_i(\mathbf{x}_{t+1}) - \alpha_i(\mathbf{x}_t)\|^2] \\
& \leq \left(1 - \frac{\eta_1 \mu_f |I_t|}{4m}\right) \|\alpha_i^t - \alpha_i(\mathbf{x}_t)\|^2 + \frac{6\eta_1 L_f^2 |I_t|}{\mu_f m} \|\mathbf{y}_i^t - \mathbf{y}_i(\mathbf{x}_t)\|^2 + \frac{2\eta_1^2 \sigma^2 |I_t|}{mB} + \frac{8mC_\alpha^2}{\eta_1 \mu_f |I_t|} \mathbb{E}_t[\|\mathbf{x}_{t+1} - \mathbf{x}_t\|^2]
\end{aligned} \tag{20}$$

where we use the assumption  $\eta_1 \leq \frac{4m}{\mu_f |I_t|}$  i.e.  $\frac{\eta_1 \mu_f |I_t|}{4m} \leq 1$ . Taking summation over all tasks  $i \in \mathcal{S}$ , we obtain

$$\begin{aligned}
& \mathbb{E}_t[\|\alpha^{t+1} - \alpha(\mathbf{x}_{t+1})\|^2] \\
& \leq \left(1 - \frac{\eta_1 \mu_f |I_t|}{4m}\right) \|\alpha^t - \alpha(\mathbf{x}_t)\|^2 + \frac{6\eta_1 L_f^2 |I_t|}{\mu_f m} \|\mathbf{y}^t - \mathbf{y}(\mathbf{x}_t)\|^2 + \frac{2\eta_1^2 \sigma^2 |I_t|}{B} + \frac{8m^2 C_\alpha^2}{\eta_1 \mu_f |I_t|} \mathbb{E}_t[\|\mathbf{x}_{t+1} - \mathbf{x}_t\|^2]
\end{aligned} \tag{21}$$

Taking summation over  $t = 0, \dots, T-1$  and taking expectation over all randomness, we obtain

$$\begin{aligned}
& \sum_{t=0}^T \mathbb{E}[\|\alpha^t - \alpha(\mathbf{x}_t)\|^2] \\
& \leq \frac{4m}{\eta_1 \mu_f |I_t|} \|\alpha^0 - \alpha(\mathbf{x}_0)\|^2 + \frac{24L_f^2}{\mu_f^2} \sum_{t=0}^{T-1} \mathbb{E}[\|\mathbf{y}^t - \mathbf{y}(\mathbf{x}_t)\|^2] + \frac{8m\mu_f \eta_1 \sigma^2 T}{B} + \frac{32m^3 C_\alpha^2}{\eta_1^2 \mu_f^2 |I_t|^2} \sum_{t=0}^{T-1} \mathbb{E}[\|\mathbf{x}_{t+1} - \mathbf{x}_t\|^2]
\end{aligned} \tag{22}$$

□

## A.5 Proof of Lemma 2.6

This proof follows from the proof of Lemma 10 in [29].

## B Convergence Analysis of Algorithm 2

First, we note that the bounded variance of  $\nabla_v \gamma_i(v, \mathbf{x}, \alpha_i, \mathbf{y}_i; \mathcal{B}_i)$  can be derived as

$$\begin{aligned}
& \mathbb{E}_{\mathcal{B}_i^t}[\|\nabla_v \gamma_i(\mathbf{v}_i^t, \mathbf{x}_t, \mathbf{y}_i^t; \mathcal{B}_i^t) - \nabla_v \gamma_i(\mathbf{v}_i^t, \mathbf{x}_t, \mathbf{y}_i^t)\|^2] \\
& = \mathbb{E}_{\mathcal{B}_i^t}[\|\nabla_{yy}^2 g_i(\mathbf{x}_t, \mathbf{y}_i^t; \mathcal{B}_i^t) \mathbf{v}_i^t - \nabla_y f_i(\mathbf{x}_t, \alpha_i^t, \mathbf{y}_i^t; \mathcal{B}_i^t) - \nabla_{yy}^2 g_i(\mathbf{x}_t, \mathbf{y}_i^t) \mathbf{v}_i^t + \nabla_y f_i(\mathbf{x}_t, \alpha_i^t, \mathbf{y}_i^t)\|^2] \\
& \leq \mathbb{E}_{\mathcal{B}_i^t}[2\|\nabla_{yy}^2 g_i(\mathbf{x}_t, \mathbf{y}_i^t; \mathcal{B}_i^t) \mathbf{v}_i^t - \nabla_{yy}^2 g_i(\mathbf{x}_t, \mathbf{y}_i^t) \mathbf{v}_i^t\|^2 + 2\|\nabla_y f_i(\mathbf{x}_t, \alpha_i^t, \mathbf{y}_i^t) - \nabla_y f_i(\mathbf{x}_t, \alpha_i^t, \mathbf{y}_i^t; \mathcal{B}_i^t)\|^2] \\
& \leq \frac{2\sigma^2}{B} \|\mathbf{v}_i^t\|^2 + \frac{2\sigma^2}{B} \leq (1 + \Gamma^2) \frac{2\sigma^2}{B}.
\end{aligned}$$

We present the detailed statement of Theorem 2.8

**Theorem B.1.** *Let  $F(\mathbf{x}_0) - F(\mathbf{x}^*) \leq \Delta_F$ . Under Assumption 2.2,2.3 and consider Algorithm 2, with  $\eta_1 \leq \min\left\{\frac{\mu_f}{L_f^2}, \frac{1}{\mu_f}, \frac{4m}{\mu_f |I_t|}, \frac{B\epsilon^2}{96C_1 \mu_f \sigma^2}\right\}$ ,  $\eta_3 \leq \min\left\{\frac{\mu_\gamma}{L_\gamma^2}, \frac{1}{\mu_\gamma}, \frac{4m}{\mu_\gamma |I_t|}, \frac{B\epsilon^2}{96C_3 \mu_g \sigma^2}\right\}$ ,  $\eta_2 \leq \min\left\{\frac{\mu_g}{L_g^2}, \frac{2m}{|I_t| \mu_g}, \frac{\mu_g B \epsilon^2}{48C_2 \sigma^2}\right\}$ ,  $\beta_0 \leq \frac{\min\{|I_t|, B\} \epsilon^2}{12C_4}$ ,  $\eta_0 \leq \min\left\{\frac{1}{2L_F}, \frac{\beta_0}{8L_F}, \frac{\eta_3 \mu_g |I_t|}{32mC_v \sqrt{C_3}}, \frac{\eta_1 \mu_f |I_t|}{32mC_\alpha \sqrt{C_1}}, \frac{|I_t| \eta_2 \mu_g}{16mC_y \sqrt{C_2}}\right\}$ ,  $T \geq \max\left\{\frac{32[F(\mathbf{x}_0) - F(\mathbf{x}^*)]}{\eta_0 \epsilon^2}, \frac{15\mathbb{E}[\|\nabla F(\mathbf{x}_0) - \mathbf{z}_1\|^2]}{\beta_0 \epsilon^2}, \frac{60C_1 \delta_{\alpha,0}}{\mu_f |I_t| \eta_1 \epsilon^2}, \frac{60C_3 \delta_{r,0}}{\eta_3 \mu_g |I_t| \epsilon^2}, \frac{30C_2 \delta_{y,0}}{|I_t| \eta_2 \mu_g \epsilon^2}\right\}$*

we have

$$\mathbb{E}[\|\nabla F(\mathbf{x}_\tau)\|^2] \leq \epsilon^2, \quad \mathbb{E}[\|\nabla F(\mathbf{x}_\tau) - \mathbf{z}_{\tau+1}\|^2] < 2\epsilon^2,$$

where  $\tau$  is randomly sampled from  $\{0, \dots, T\}$ ,  $C_1, C_2, C_3, C_4$  are constants defined in the proof, and  $L_F$  is the Lipschitz continuity constant of  $\nabla F(\mathbf{x})$ .

To prove Theorem B.1, we need the following Lemmas.

**Lemma B.2** (Lemma 4.3 [25]). *Under Assumption 2.2,  $\mathbf{v}_i(\mathbf{x}, \alpha_i, \mathbf{y}_i)$  is  $C_v = L_g/\mu_g$ -Lipschitz-continuous for all  $i$ .*

**Lemma B.3.** *Consider the updates for  $\mathbf{v}_i^t$  in Algorithm 2, under Assumption 2.2, 2.3, with  $\eta_3 \leq \min \left\{ \frac{\mu_\gamma}{L_g^2}, \frac{1}{\mu_\gamma}, \frac{4m}{\mu_\gamma |I_t|} \right\}$ , we have*

$$\sum_{t=0}^T \mathbb{E}_t[\delta_{\mathbf{v},t}] \leq \frac{4m}{\eta_3 \mu_g |I_t|} \delta_{\mathbf{v},0} + \frac{24L_g^2}{\mu_g^2} \sum_{t=0}^{T-1} \mathbb{E}[\delta_{y,t} + \delta_{\alpha,t}] + \frac{8m\mu_g\eta_3\sigma^2T}{B} + \frac{32m^3C_v^2\eta_0^2}{\eta_3^2\mu_g^2|I_t|^2} \sum_{t=0}^{T-1} \mathbb{E}[\|\mathbf{z}_{t+1}\|^2].$$

*Proof of Theorem B.1.* First, recall and define the following notations

$$\begin{aligned} \nabla F(\mathbf{x}_t) &= \frac{1}{m} \sum_{i \in \mathcal{S}} \nabla_x f_i(\mathbf{x}_t, \alpha_i(\mathbf{x}_t), \mathbf{y}_i(\mathbf{x}_t)) - \nabla_{xy}^2 g_i(\mathbf{x}_t, \mathbf{y}_i(\mathbf{x}_t)) [\nabla_{yy}^2 g_i(\mathbf{x}_t, \mathbf{y}_i(\mathbf{x}_t))]^{-1} \nabla_y f_i(\mathbf{x}_t, \alpha_i(\mathbf{x}_t), \mathbf{y}_i(\mathbf{x}_t)) \\ \nabla F(\mathbf{x}_t, \boldsymbol{\alpha}^t, \mathbf{y}^t, \mathbf{v}_i^t) &:= \frac{1}{m} \sum_{i \in \mathcal{S}} \nabla F_i(\mathbf{x}_t, \alpha_i^t, \mathbf{y}_i^t) := \nabla_x f_i(\mathbf{x}_t, \alpha_i^t, \mathbf{y}_i^t) - \nabla_{xy}^2 g_i(\mathbf{x}_t, \mathbf{y}_i^t) \mathbf{v}_i^t \\ \Delta^{t+1} &= \frac{1}{|I_t|} \sum_{i \in I_t} \Delta_i^{t+1} := \nabla_x f_i(\mathbf{x}_t, \alpha_i^t, \mathbf{y}_i^t; \mathcal{B}_i^t) - \nabla_{xy}^2 g_i(\mathbf{x}_t, \mathbf{y}_i^t; \tilde{\mathcal{B}}_i^t) \mathbf{v}_i^t \end{aligned}$$

Consider the update  $\mathbf{z}_{t+1} = (1 - \beta_0)\mathbf{z}_t + \beta_0\Delta^{t+1}$  in Algorithm 2, we have

$$\begin{aligned} &\mathbb{E}_t[\|\nabla F(\mathbf{x}_t) - \mathbf{z}_{t+1}\|^2] \\ &= \mathbb{E}_t[\|\nabla F(\mathbf{x}_t) - (1 - \beta_0)\mathbf{z}_t - \beta_0\Delta^{t+1}\|^2] \\ &= \mathbb{E}_t[\|(1 - \beta_0)(\nabla F(\mathbf{x}_{t-1}) - \mathbf{z}_t) + (1 - \beta_0)(\nabla F(\mathbf{x}_t) - \nabla F(\mathbf{x}_{t-1})) + \beta_0(\nabla F(\mathbf{x}_t) - \nabla F(\mathbf{x}_t, \boldsymbol{\alpha}^t, \mathbf{y}^t, \mathbf{v}^t)) \\ &\quad + \beta_0(\nabla F(\mathbf{x}_t, \boldsymbol{\alpha}^t, \mathbf{y}^t, \mathbf{v}^t) - \Delta^{t+1})\|^2] \\ &\stackrel{(a)}{=} \|(1 - \beta_0)(\nabla F(\mathbf{x}_{t-1}) - \mathbf{z}_t) + (1 - \beta_0)(\nabla F(\mathbf{x}_t) - \nabla F(\mathbf{x}_{t-1})) + \beta_0(\nabla F(\mathbf{x}_t) - \nabla F(\mathbf{x}_t, \boldsymbol{\alpha}^t, \mathbf{y}^t, \mathbf{v}^t))\|^2 \\ &\quad + \beta_0^2 \mathbb{E}_t[\|\nabla F(\mathbf{x}_t, \boldsymbol{\alpha}^t, \mathbf{y}^t, \mathbf{v}^t) - \Delta^{t+1}\|^2] \\ &\stackrel{(b)}{\leq} (1 + \beta_0)(1 - \beta_0)^2 \|\nabla F(\mathbf{x}_{t-1}) - \mathbf{z}_t\|^2 + 2(1 + \frac{1}{\beta_0}) [\|\nabla F(\mathbf{x}_t) - \nabla F(\mathbf{x}_{t-1})\|^2 + \beta_0^2 \|\nabla F(\mathbf{x}_t) - \nabla F(\mathbf{x}_t, \boldsymbol{\alpha}^t, \mathbf{y}^t, \mathbf{v}^t)\|^2] \\ &\quad + \beta_0^2 \mathbb{E}_t[\|\nabla F(\mathbf{x}_t, \boldsymbol{\alpha}^t, \mathbf{y}^t, \mathbf{v}^t) - \Delta^{t+1}\|^2] \\ &\stackrel{(c)}{\leq} (1 - \beta_0) \|\nabla F(\mathbf{x}_{t-1}) - \mathbf{z}_t\|^2 + \frac{4L_F^2}{\beta_0} \|\mathbf{x}_t - \mathbf{x}_{t-1}\|^2 + 4\beta_0 \underbrace{\|\nabla F(\mathbf{x}_t) - \nabla F(\mathbf{x}_t, \boldsymbol{\alpha}^t, \mathbf{y}^t, \mathbf{v}^t)\|^2}_{\textcircled{a}} \\ &\quad + \beta_0^2 \underbrace{\mathbb{E}_t[\|\nabla F(\mathbf{x}_t, \boldsymbol{\alpha}^t, \mathbf{y}^t, \mathbf{v}^t) - \Delta^{t+1}\|^2]}_{\textcircled{b}} \end{aligned} \tag{23}$$

where (a) follows from  $\mathbb{E}_t[\nabla F(\mathbf{x}_t, \boldsymbol{\alpha}^t, \mathbf{y}^t)] = \Delta^{t+1}$ , (b) is due to  $\|a + b\|^2 \leq (1 + \beta)\|a\|^2 + (1 + \frac{1}{\beta})\|b\|^2$ , and (c) uses the assumption  $\beta_0 \leq 1$  and Lemma A.2.



Furthermore, one may bound the last two terms in 23 as following

$$\begin{aligned}
\textcircled{a} &= \|\nabla F(\mathbf{x}_t) - \nabla F(\mathbf{x}_t, \alpha^t, \mathbf{y}^t, \mathbf{v}_i^t)\|^2 \\
&= \left\| \frac{1}{m} \sum_{i \in S} \nabla_x f_i(\mathbf{x}_t, \alpha_i(\mathbf{x}_t), \mathbf{y}_i(\mathbf{x}_t)) - \nabla_{xy}^2 g_i(\mathbf{x}_t, \mathbf{y}_i(\mathbf{x}_t)) [\nabla_{yy}^2 g_i(\mathbf{x}_t, \mathbf{y}_i(\mathbf{x}_t))]^{-1} \nabla_y f_i(\mathbf{x}_t, \alpha_i(\mathbf{x}_t), \mathbf{y}_i(\mathbf{x}_t)) \right. \\
&\quad \left. - \frac{1}{m} \sum_{i \in S} \nabla_x f_i(\mathbf{x}_t, \alpha_i^t, \mathbf{y}_i^t) - \nabla_{xy}^2 g_i(\mathbf{x}_t, \mathbf{y}_i^t) \mathbf{v}_i^t \right\|^2 \\
&\leq \frac{1}{m} \sum_{i \in S} 2 \|\nabla_x f_i(\mathbf{x}_t, \alpha_i(\mathbf{x}_t), \mathbf{y}_i(\mathbf{x}_t)) - \nabla_x f_i(\mathbf{x}_t, \alpha_i^t, \mathbf{y}_i^t)\|^2 \\
&\quad + 4 \left\| \nabla_{xy}^2 g_i(\mathbf{x}_t, \mathbf{y}_i^t) [\mathbf{v}_i^t - [\nabla_{yy}^2 g_i(\mathbf{x}_t, \mathbf{y}_i(\mathbf{x}_t))]^{-1} \nabla_y f_i(\mathbf{x}_t, \alpha_i(\mathbf{x}_t), \mathbf{y}_i(\mathbf{x}_t))] \right\|^2 \\
&\quad + 4 \left\| [\nabla_{xy}^2 g_i(\mathbf{x}_t, \mathbf{y}_i^t) - \nabla_{xy}^2 g_i(\mathbf{x}_t, \mathbf{y}_i(\mathbf{x}_t))] [\nabla_{yy}^2 g_i(\mathbf{x}_t, \mathbf{y}_i(\mathbf{x}_t))]^{-1} \nabla_y f_i(\mathbf{x}_t, \alpha_i(\mathbf{x}_t), \mathbf{y}_i(\mathbf{x}_t)) \right\|^2 \\
&\leq \frac{1}{m} \sum_{i \in S} 2L_f^2 [\|\alpha_i(\mathbf{x}_t) - \alpha_i^t\|^2 + \|\mathbf{y}_i(\mathbf{x}_t) - \mathbf{y}_i^t\|^2] \\
&\quad + \frac{1}{m} \sum_{i \in S} 4C_{gxy}^2 \|\mathbf{v}_i^t - [\nabla_{yy}^2 g_i(\mathbf{x}_t, \mathbf{y}_i(\mathbf{x}_t))]^{-1} \nabla_y f_i(\mathbf{x}_t, \alpha_i(\mathbf{x}_t), \mathbf{y}_i(\mathbf{x}_t))\|^2 + \frac{4L_{gxy}^2 C_f^2}{\mu_g^2 m} \|\mathbf{y}^t - \mathbf{y}(\mathbf{x}_t)\|^2 \\
&= \frac{1}{m} \sum_{i \in S} 2L_f^2 [\|\alpha_i(\mathbf{x}_t) - \alpha_i^t\|^2 + \|\mathbf{y}_i(\mathbf{x}_t) - \mathbf{y}_i^t\|^2] + \frac{4C_{gxy}^2}{m} \|\mathbf{v}^t - \mathbf{v}(\mathbf{x}_t)\|^2 + \frac{4L_{gxy}^2 C_f^2}{\mu_g^2 m} \|\mathbf{y}^t - \mathbf{y}(\mathbf{x}_t)\|^2 \\
&= \frac{\tilde{C}_1}{m} \|\alpha(\mathbf{x}_t) - \alpha^t\|^2 + \frac{\tilde{C}_2}{m} \|\mathbf{y}^t - \mathbf{y}(\mathbf{x}_t)\|^2 + \frac{C_3}{m} \|\mathbf{v}^t - \mathbf{v}(\mathbf{x}_t)\|^2
\end{aligned} \tag{24}$$

$$\begin{aligned}
\textcircled{b} &= \mathbb{E}_t [\|\nabla F(\mathbf{x}_t, \alpha^t, \mathbf{y}^t, \mathbf{v}_i^t) - \Delta^{t+1}\|^2] \\
&\leq \mathbb{E}_t \left[ 2 \left\| \frac{1}{m} \sum_{i \in S} \nabla F_i(\mathbf{x}_t, \alpha_i^t, \mathbf{y}_i^t, \mathbf{v}_i^t) - \frac{1}{|I_t|} \sum_{i \in I_t} \nabla F_i(\mathbf{x}_t, \alpha_i^t, \mathbf{y}_i^t, \mathbf{v}_i^t) \right\|^2 + 2 \left\| \frac{1}{|I_t|} \sum_{i \in I_t} \nabla F_i(\mathbf{x}_t, \alpha_i^t, \mathbf{y}_i^t, \mathbf{v}_i^t) - \frac{1}{|I_t|} \sum_{i \in I_t} \Delta_i^{t+1} \right\|^2 \right] \\
&\leq \frac{8B_F}{B} + \frac{2}{m} \sum_{i \in S} \mathbb{E}_{\mathcal{B}_i^t} \left[ 2 \|\nabla_x f_i(\mathbf{x}_t, \alpha_i^t, \mathbf{y}_i^t) - \nabla_x f_i(\mathbf{x}_t, \alpha_i^t, \mathbf{y}_i^t; \mathcal{B}_i^t)\|^2 + 2 \|[\nabla_{xy}^2 g_i(\mathbf{x}_t, \mathbf{y}_i^t) - \nabla_{xy}^2 g_i(\mathbf{x}_t, \mathbf{y}_i^t; \tilde{\mathcal{B}}_i^t)] \mathbf{v}_i^t\|^2 \right] \\
&\leq \frac{8B_F}{|I_t|} + \frac{4\sigma^2}{B} + \frac{4\sigma^2}{B} \frac{1}{m} \sum_{i \in S} \|\mathbf{v}_i^t\|^2 \\
&=: \frac{C_4}{\min\{|I_t|, B\}}
\end{aligned} \tag{25}$$

where  $B_F$  is the upper bound of  $\|\nabla F_i(\mathbf{x}, \alpha_i, \mathbf{y}_i, \mathbf{v}_i^t)\|^2$ .

Thus combining inequalities 23,24,25, we have

$$\begin{aligned}
\mathbb{E}_t [\|\nabla F(\mathbf{x}_t) - \mathbf{z}_{t+1}\|^2] &\leq (1 - \beta_0) \|\nabla F(\mathbf{x}_{t-1}) - \mathbf{z}_t\|^2 + \frac{4L_F^2}{\beta_0} \|\mathbf{x}_t - \mathbf{x}_{t-1}\|^2 + 4\beta_0 \left[ \frac{\tilde{C}_1}{m} \|\alpha(\mathbf{x}_t) - \alpha^t\|^2 \right. \\
&\quad \left. + \frac{\tilde{C}_2}{m} \|\mathbf{y}^t - \mathbf{y}(\mathbf{x}_t)\|^2 + \frac{C_3}{m} \|\mathbf{v}^t - \mathbf{v}(\mathbf{x}_t)\|^2 \right] + \frac{C_4 \beta_0^2}{\min\{|I_t|, B\}}
\end{aligned}$$

For simplicity, denote  $\delta_{\alpha,t} := \|\boldsymbol{\alpha}^t - \boldsymbol{\alpha}(\mathbf{x}_t)\|^2$ ,  $\delta_{y,t} := \|\mathbf{y}^t - \mathbf{y}(\mathbf{x}_t)\|^2$  and  $\delta_{v,t} := \sum_{i \in \mathcal{S}} \|\mathbf{v}^t - \mathbf{v}(\mathbf{x}_t)\|^2$ . Take expectation over all randomness and summation over  $t = 1, \dots, T$  to get

$$\begin{aligned} \sum_{t=0}^T \mathbb{E}[\|\nabla F(\mathbf{x}_t) - \mathbf{z}_{t+1}\|^2] &\leq \frac{1}{\beta_0} \mathbb{E}[\|\nabla F(\mathbf{x}_0) - \mathbf{z}_1\|^2] + \frac{4L_F^2 \eta_0^2}{\beta_0^2} \sum_{t=1}^T \mathbb{E}[\|\mathbf{z}_t\|^2] + \frac{\tilde{C}_1}{m} \sum_{t=1}^T \mathbb{E}[\delta_{\alpha,t}] \\ &\quad + \frac{\tilde{C}_2}{m} \sum_{t=1}^T \mathbb{E}[\delta_{y,t}] + \frac{C_3}{m} \sum_{t=1}^T \mathbb{E}[\delta_{v,t}] + \frac{C_4 \beta_0 T}{\min\{|I_t|, B\}} \end{aligned} \quad (26)$$

Recall that from Lemma 2.5, Lemma 2.4 and Lemma B.3, we have

$$\sum_{t=0}^T \mathbb{E}[\delta_{\alpha,t}] \leq \frac{4m}{\mu_f |I_t| \eta_1} \delta_{\alpha,0} + \frac{24L_f^2}{\mu_f^2} \sum_{t=0}^{T-1} \mathbb{E}[\delta_{y,t}] + \frac{8m\mu_f \eta_1 \sigma^2 T}{B} + \frac{32m^3 C_\alpha^2 \eta_0^2}{\eta_1^2 \mu_f^2 |I_t|^2} \sum_{t=0}^{T-1} \mathbb{E}[\|\mathbf{z}_{t+1}\|^2] \quad (27)$$

$$\sum_{t=0}^T \mathbb{E}[\delta_{y,t}] \leq \frac{2m}{|I_t| \eta_2 \mu_g} \delta_{y,0} + \frac{4m\eta_2 T \sigma^2}{\mu_g B} + \frac{8m^3 C_y^2 \eta_0^2}{|I_t|^2 \eta_2^2 \mu_g^2} \sum_{t=0}^{T-1} \mathbb{E}[\|\mathbf{z}_{t+1}\|^2] \quad (28)$$

$$\sum_{t=0}^T \mathbb{E}_t[\delta_{\mathbf{v},t}] \leq \frac{4m}{\eta_3 \mu_g |I_t|} \delta_{\mathbf{v},0} + \frac{24L_g^2}{\mu_g^2} \sum_{t=0}^{T-1} \mathbb{E}[\delta_{y,t} + \delta_{\alpha,t}] + \frac{8m\mu_g \eta_3 \sigma^2 T}{B} + \frac{32m^3 C_v^2 \eta_0^2}{\eta_3^2 \mu_g^2 |I_t|^2} \sum_{t=0}^{T-1} \mathbb{E}[\|\mathbf{z}_{t+1}\|^2]. \quad (29)$$

Combining inequalities 26,27,28,29, we have

$$\begin{aligned}
& \sum_{t=0}^T \mathbb{E}[\|\nabla F(\mathbf{x}_t) - \mathbf{z}_{t+1}\|^2] \\
& \leq \frac{1}{\beta_0} \mathbb{E}[\|\nabla F(\mathbf{x}_0) - \mathbf{z}_1\|^2] + \frac{4L_F^2\eta_0^2}{\beta_0^2} \sum_{t=1}^T \mathbb{E}[\|\mathbf{z}_t\|^2] + \frac{\tilde{C}_1}{m} \sum_{t=1}^T \mathbb{E}[\delta_{\alpha,t}] + \frac{\tilde{C}_2}{m} \sum_{t=1}^T \mathbb{E}[\delta_{y,t}] \\
& \quad + \frac{C_3}{m} \left\{ \frac{4m}{\eta_3\mu_g|I_t|} \delta_{v,0} + \frac{24L_g^2}{\mu_g^2} \sum_{t=0}^{T-1} \mathbb{E}[\delta_{y,t} + \delta_{\alpha,t}] + \frac{8m\mu_g\eta_3\sigma^2T}{B} + \frac{32m^3C_v^2\eta_0^2}{\eta_3^2\mu_g^2|I_t|^2} \sum_{t=0}^{T-1} \mathbb{E}[\|\mathbf{z}_{t+1}\|^2] \right\} \\
& \quad + \frac{C_4\beta_0T}{\min\{|I_t|, B\}} \\
& \leq \frac{1}{\beta_0} \mathbb{E}[\|\nabla F(\mathbf{x}_0) - \mathbf{z}_1\|^2] + \left( \frac{4L_F^2\eta_0^2}{\beta_0^2} + \frac{32m^2C_v^2\eta_0^2C_3}{\eta_3^2\mu_g^2|I_t|^2} \right) \sum_{t=1}^T \mathbb{E}[\|\mathbf{z}_t\|^2] + \left( \frac{\tilde{C}_1}{m} + \frac{24L_g^2C_3}{\mu_g^2m} \right) \sum_{t=1}^T \mathbb{E}[\delta_{\alpha,t}] \\
& \quad + \left( \frac{\tilde{C}_2}{m} + \frac{24L_g^2C_3}{\mu_g^2m} \right) \sum_{t=1}^T \mathbb{E}[\delta_{y,t}] + \frac{4C_3}{\eta_3\mu_g|I_t|} \delta_{v,0} + \frac{8C_3\mu_g\eta_3\sigma^2T}{B} + \frac{C_4\beta_0T}{\min\{|I_t|, B\}} \\
& \leq \frac{1}{\beta_0} \mathbb{E}[\|\nabla F(\mathbf{x}_0) - \mathbf{z}_1\|^2] + \left( \frac{4L_F^2\eta_0^2}{\beta_0^2} + \frac{32m^2C_v^2\eta_0^2C_3}{\eta_3^2\mu_g^2|I_t|^2} + \frac{32m^2C_\alpha^2\eta_0^2C_1}{\eta_1^2\mu_f^2|I_t|^2} \right) \sum_{t=1}^T \mathbb{E}[\|\mathbf{z}_t\|^2] \\
& \quad + \frac{4C_1}{\mu_f|I_t|\eta_1} \delta_{\alpha,0} + \frac{8C_1\mu_f\eta_1\sigma^2T}{B} + \frac{4C_3}{\eta_3\mu_g|I_t|} \delta_{v,0} + \frac{8C_3\mu_g\eta_3\sigma^2T}{B} + \frac{C_4\beta_0T}{\min\{|I_t|, B\}} \\
& \quad + \left( \frac{\tilde{C}_2}{m} + \frac{24L_g^2C_3}{\mu_g^2m} + \frac{24L_f^2C_1}{\mu_f^2m} \right) \sum_{t=1}^T \mathbb{E}[\delta_{y,t}] \\
& \leq \frac{1}{\beta_0} \mathbb{E}[\|\nabla F(\mathbf{x}_0) - \mathbf{z}_1\|^2] + \left( \frac{4L_F^2\eta_0^2}{\beta_0^2} + \frac{32m^2C_v^2\eta_0^2C_3}{\eta_3^2\mu_g^2|I_t|^2} + \frac{32m^2C_\alpha^2\eta_0^2C_1}{\eta_1^2\mu_f^2|I_t|^2} + \frac{8m^2C_y^2\eta_0^2C_2}{|I_t|^2\eta_2^2\mu_g^2} \right) \sum_{t=1}^T \mathbb{E}[\|\mathbf{z}_t\|^2] \\
& \quad + \frac{4C_1}{\mu_f|I_t|\eta_1} \delta_{\alpha,0} + \frac{8C_1\mu_f\eta_1\sigma^2T}{B} + \frac{4C_3}{\eta_3\mu_g|I_t|} \delta_{v,0} + \frac{8C_3\mu_g\eta_3\sigma^2T}{B} + \frac{C_4\beta_0T}{\min\{|I_t|, B\}} \\
& \quad + \frac{2C_2}{|I_t|\eta_2\mu_g} \delta_{y,0} + \frac{4C_2\eta_2T\sigma^2}{\mu_gB}
\end{aligned} \tag{30}$$

where  $C_1 := \tilde{C}_1 + \frac{24L_g^2C_3}{\mu_g^2}$  and  $C_2 := \tilde{C}_2 + \frac{24L_g^2C_3}{\mu_g^2} + \frac{24L_f^2C_1}{\mu_f^2}$

Recall Lemma A.3, we have

$$F(\mathbf{x}_{t+1}) \leq F(\mathbf{x}_t) + \frac{\eta_x}{2} \|\nabla F(\mathbf{x}_t) - \mathbf{z}_{t+1}\|^2 - \frac{\eta_0}{2} \|\nabla F(\mathbf{x}_t)\|^2 - \frac{\eta_0}{4} \|\mathbf{z}_{t+1}\|^2$$

Combining with 30, we obtain

$$\begin{aligned}
& \frac{1}{T+1} \sum_{t=0}^T \mathbb{E}[\|\nabla F(\mathbf{x}_t)\|^2] \\
& \leq \frac{2\mathbb{E}[F(\mathbf{x}_0) - F(\mathbf{x}_{T+1})]}{\eta_0 T} + \frac{1}{T} \sum_{t=0}^T \mathbb{E}[\|\nabla F(\mathbf{x}_t) - \mathbf{z}_{t+1}\|^2] - \frac{1}{2T} \sum_{t=0}^T \mathbb{E}[\|\mathbf{z}_{t+1}\|^2] \\
& \leq \frac{1}{T} \left\{ \frac{2[F(\mathbf{x}_0) - F(\mathbf{x}^*)]}{\eta_0} + \frac{1}{\beta_0} \mathbb{E}[\|\nabla F(\mathbf{x}_0) - \mathbf{z}_1\|^2] + \frac{4C_1}{\mu_f |I_t| \eta_1} \delta_{\alpha,0} + \frac{4C_3}{\eta_3 \mu_g |I_t|} \delta_{\mathbf{v},0} + \frac{2C_2}{|I_t| \eta_2 \mu_g} \delta_{y,0} \right\} \\
& \quad + \frac{8C_1 \mu_f \eta_1 \sigma^2}{B} + \frac{8C_3 \mu_g \eta_3 \sigma^2}{B} + \frac{4C_2 \eta_2 \sigma^2}{\mu_g B} + \frac{C_4 \beta_0}{\min\{|I_t|, B\}} \\
& \quad + \frac{1}{T} \left( \frac{4L_F^2 \eta_0^2}{\beta_0^2} + \frac{32m^2 C_v^2 \eta_0^2 C_3}{\eta_3^2 \mu_g^2 |I_t|^2} + \frac{32m^2 C_\alpha^2 \eta_0^2 C_1}{\eta_1^2 \mu_f^2 |I_t|^2} + \frac{8m^2 C_y^2 \eta_0^2 C_2}{|I_t|^2 \eta_2^2 \mu_g^2} - \frac{1}{2} \right) \sum_{t=1}^T \mathbb{E}[\|\mathbf{z}_t\|^2]
\end{aligned} \tag{31}$$

By setting

$$\eta_0^2 \leq \min \left\{ \frac{\beta_0^2}{64L_F^2}, \frac{\eta_3^2 \mu_g^2 |I_t|^2}{512m^2 C_v^2 C_3}, \frac{\eta_1^2 \mu_f^2 |I_t|^2}{512m^2 C_\alpha^2 C_1}, \frac{|I_t|^2 \eta_2^2 \mu_g^2}{128m^2 C_y^2 C_2} \right\}$$

we have

$$\frac{4L_F^2 \eta_0^2}{\beta_0^2} + \frac{32m^2 C_v^2 \eta_0^2 C_3}{\eta_3^2 \mu_g^2 |I_t|^2} + \frac{32m^2 C_\alpha^2 \eta_0^2 C_1}{\eta_1^2 \mu_f^2 |I_t|^2} + \frac{8m^2 C_y^2 \eta_0^2 C_2}{|I_t|^2 \eta_2^2 \mu_g^2} - \frac{1}{4} \leq 0$$

which implies that the last term of the right hand side of inequality 31 is less than or equal to zero. Hence

$$\begin{aligned}
& \frac{1}{T+1} \sum_{t=0}^T \mathbb{E}[\|\nabla F(\mathbf{x}_t)\|^2] \\
& \leq \frac{1}{T} \left\{ \frac{2[F(\mathbf{x}_0) - F(\mathbf{x}^*)]}{\eta_0} + \frac{1}{\beta_0} \mathbb{E}[\|\nabla F(\mathbf{x}_0) - \mathbf{z}_1\|^2] + \frac{4C_1}{\mu_f |I_t| \eta_1} \delta_{\alpha,0} + \frac{4C_3}{\eta_3 \mu_g |I_t|} \delta_{\mathbf{v},0} + \frac{2C_2}{|I_t| \eta_2 \mu_g} \delta_{y,0} \right\} \\
& \quad + \frac{8C_1 \mu_f \eta_1 \sigma^2}{B} + \frac{8C_3 \mu_g \eta_3 \sigma^2}{B} + \frac{4C_2 \eta_2 \sigma^2}{\mu_g B} + \frac{C_4 \beta_0}{\min\{|I_t|, B\}}
\end{aligned} \tag{32}$$

With

$$\begin{aligned}
& \eta_1 \leq \frac{B\epsilon^2}{96C_1 \mu_f \sigma^2}, \eta_3 \leq \frac{B\epsilon^2}{96C_3 \mu_g \sigma^2}, \eta_2 \leq \frac{\mu_g B \epsilon^2}{48C_2 \sigma^2}, \beta_0 \leq \frac{\min\{|I_t|, B\} \epsilon^2}{12C_4} \\
& T \geq \max \left\{ \frac{32[F(\mathbf{x}_0) - F(\mathbf{x}^*)]}{\eta_0 \epsilon^2}, \frac{15\mathbb{E}[\|\nabla F(\mathbf{x}_0) - \mathbf{z}_1\|^2]}{\beta_0 \epsilon^2}, \frac{60C_1 \delta_{\alpha,0}}{\mu_f |I_t| \eta_1 \epsilon^2}, \frac{60C_3 \delta_{\mathbf{v},0}}{\eta_3 \mu_g |I_t| \epsilon^2}, \frac{30C_2 \delta_{y,0}}{|I_t| \eta_2 \mu_g \epsilon^2} \right\}
\end{aligned}$$

we have

$$\frac{1}{T+1} \sum_{t=0}^T \mathbb{E}[\|\nabla F(\mathbf{x}_t)\|^2] \leq \frac{\epsilon^2}{3} + \frac{\epsilon^2}{3} < \epsilon^2$$

Furthermore, to show the second part of the theorem, following from inequality 30, we have

$$\begin{aligned}
& \sum_{t=0}^T \mathbb{E}[\|\nabla F(\mathbf{x}_t) - \mathbf{z}_{t+1}\|^2] \\
& \leq \frac{\mathbb{E}[\|\nabla F(\mathbf{x}_0) - \mathbf{z}_1\|^2]}{\beta_0} + \frac{4C_1 \delta_{\alpha,0}}{\mu_f |I_t| \eta_1} + \frac{8C_1 \mu_f \eta_1 \sigma^2 T}{B} + \frac{4C_3 \delta_{\mathbf{v},0}}{\eta_3 \mu_g |I_t|} + \frac{8C_3 \mu_g \eta_3 \sigma^2 T}{B} + \frac{C_4 \beta_0 T}{\min\{|I_t|, B\}} \\
& \quad + \frac{2C_2 \delta_{y,0}}{|I_t| \eta_2 \mu_g} + \frac{4C_2 \eta_2 T \sigma^2}{\mu_g B} + \frac{1}{2} \sum_{t=0}^{T-1} \mathbb{E}[\|\nabla F(\mathbf{x}_t)\|^2] + \mathbb{E}[\|\nabla F(\mathbf{x}_t) - \mathbf{z}_{t+1}\|^2]
\end{aligned} \tag{33}$$

With parameter set above, we have

$$\frac{1}{T+1} \sum_{t=0}^T \mathbb{E}[\|\nabla F(\mathbf{x}_t) - \mathbf{z}_{t+1}\|^2] < 2\epsilon^2$$

□

### B.0.1 Proof of Lemma B.3

This proof is the same as the proof of Lemma 2.5.

## C Algorithm and Derivation for Multi-task Deep Partial AUC Maximization

---

### Algorithm 3 Min-Max Bilevel Optimization for pAUC Maximization (MMB-pAUC)

---

**Require:**  $\alpha^0, \lambda^0, H^0, \mathbf{z}^0, \mathbf{w}^0, \mathbf{a}^0, \mathbf{b}^0$

```

1: for  $t = 0, 1, \dots, T$  do
2:   Draw task batch  $I_t \subset \mathcal{S}$ .
3:   Draw data sample batch  $\mathcal{B}_k^t$  for each  $k \in I_t$ 
4:   For sampled tasks  $k \in I_t$ , update
5:      $\alpha_k^{t+1} \leftarrow \alpha_k^t + \eta_1 G_\alpha(\mathbf{w}^t, \alpha_k^t, \lambda_k^t; \mathcal{B}_k^t)$   $\diamond G_\alpha(\cdot)$  denotes a stochastic gradient w.r.t  $\alpha_k$ 
6:      $\lambda_k^{t+1} \leftarrow \lambda_k^t - \eta_2 \nabla_\lambda L_k(\lambda_k^t, \mathbf{w}^t; \mathcal{B}_k^t)$ 
7:      $H_k^{t+1} \leftarrow (1 - \beta_1) H_k^t + \beta_1 \nabla_{\lambda\lambda}^2 L_k(\lambda_k^t, \mathbf{w}^t; \mathcal{B}_k^t)$ 
8:   Compute loss  $G^{t+1}$  according to 38  $\diamond G^{t+1}$  denotes an appropriate loss
9:   Update gradient estimator  $\Delta^{t+1} \leftarrow \text{autograd}(G^{t+1})$ 
10:   $\mathbf{z}^{t+1} \leftarrow (1 - \beta_0) \mathbf{z}^t + \beta_0 \Delta^{t+1}$ 
11:   $(\mathbf{w}^{t+1}, \mathbf{a}^{t+1}, \mathbf{b}^{t+1}) \leftarrow (\mathbf{w}^t, \mathbf{a}^t, \mathbf{b}^t) - \eta_0 \mathbf{z}^{t+1}$ 
12: end for
```

---

Let  $\mathcal{D}_-[K]$  denote the top- $K$  negative examples according to their prediction scores. Let  $n_+, n_-$  denote the number of positive and negative label samples respectively. Then we have partial AUC loss formulated as following

$$\min_{\mathbf{w}} \frac{1}{n_+} \sum_{\mathbf{x}_i \in \mathcal{D}_+} \frac{1}{n_- \rho} \sum_{\mathbf{x}_j \in \mathcal{D}_-[K]} (h_{\mathbf{w}}(\mathbf{x}_j) - h_{\mathbf{w}}(\mathbf{x}_i) + c)^2$$

where  $K = n_- \rho$ . Let  $a(\mathbf{w}) = \frac{1}{n_+} \sum_{\mathbf{x}_i \in \mathcal{D}_+} h_{\mathbf{w}}(\mathbf{x}_i)$  and  $b(\mathbf{w}) = \frac{1}{n_- \rho} \sum_{\mathbf{x}_j \in \mathcal{D}_-[K]} h_{\mathbf{w}}(\mathbf{x}_j)$ . Then we can transform the objective as

$$\begin{aligned} & \frac{1}{n_+} \sum_{\mathbf{x}_i \in \mathcal{D}_+} \frac{1}{n_- \rho} \sum_{\mathbf{x}_j \in \mathcal{D}_-[K]} (h_{\mathbf{w}}(\mathbf{x}_j) - b(\mathbf{w}) + a(\mathbf{w}) - h_{\mathbf{w}}(\mathbf{x}_i) + b(\mathbf{w}) - a(\mathbf{w}) + c)^2 \\ &= \frac{1}{n_+} \sum_{\mathbf{x}_i \in \mathcal{D}_+} (h_{\mathbf{w}}(\mathbf{x}_i) - a(\mathbf{w}))^2 + \frac{1}{n_- \rho} \sum_{\mathbf{x}_j \in \mathcal{D}_-[K]} (h_{\mathbf{w}}(\mathbf{x}_j) - b(\mathbf{w}))^2 + (b(\mathbf{w}) - a(\mathbf{w}) + c)^2 \end{aligned}$$

Then we can write the problem as

$$\min_{\mathbf{w}, a, b} \frac{1}{n_+} \sum_{\mathbf{x}_i \in \mathcal{D}_+} (h_{\mathbf{w}}(\mathbf{x}_i) - a)^2 + \frac{1}{n_- \rho} \sum_{\mathbf{x}_j \in \mathcal{D}_-[K]} \mathbb{I}(\mathbf{x}_j \in \mathcal{D}_-[K]) (h_{\mathbf{w}}(\mathbf{x}_j) - b)^2 + (b(\mathbf{w}) - a(\mathbf{w}) + c)^2 \quad (34)$$

Replacing the indicator function by  $\mathbb{I}(\mathbf{x}_j \in \mathcal{D}_-[K]) = \psi(h_{\mathbf{w}}(\mathbf{x}_j) - \lambda(\mathbf{w}))$ , where  $\lambda(\mathbf{w})$  represents the  $K + 1$ -th largest scores among all negative examples, which can be represented as

$$\lambda(\mathbf{w}) = \arg \min_{\lambda} \frac{K + \varepsilon}{n_-} \lambda + \frac{1}{n_-} \sum_{\mathbf{x} \in \mathcal{D}_-} (h_{\mathbf{w}}(\mathbf{x}) - \lambda)_+.$$

We smooth the problem as

$$\hat{\lambda}(\mathbf{w}) = \arg \min_{\lambda} L(\lambda, \mathbf{w}) := \frac{K + \varepsilon}{n_-} \lambda + \frac{\tau_2}{2} \lambda^2 + \frac{1}{n_-} \sum_{\mathbf{x} \in \mathcal{D}_-} \tau_1 \ln(1 + \exp((h_{\mathbf{w}}(\mathbf{x}) - \lambda)/\tau_1)).$$

Due to the fact that the last term  $(b(\mathbf{w}) - a(\mathbf{w}) + c)^2$  in Problem 34 cannot be directly obtained since  $a(\mathbf{w})$  and  $b(\mathbf{w})$  are expectations, one may use  $p^2 = \max_{\alpha} 2p\alpha - \alpha^2$  to get

$$(b(\mathbf{w}) - a(\mathbf{w}) + c)^2 = \max_{\alpha} \mathbb{E}_{\mathbf{x}_j \in \mathcal{D}_-[K], \mathbf{x}_i \in \mathcal{D}_+} [2\alpha(h_{\mathbf{w}}(\mathbf{x}_j) - h_{\mathbf{w}}(\mathbf{x}_i) + c) - \alpha^2] \quad (35)$$

Then by replacing the top-K selector with  $\phi(h_{\mathbf{w}}(\mathbf{x}_j) - \hat{\lambda}(\mathbf{w}))$ , the partial AUC minimization problem can be formulated as a min-max bilevel optimization problem.

$$\begin{aligned} & \min_{\mathbf{w}, a, b} \frac{1}{n_+} \sum_{\mathbf{x}_i \in \mathcal{D}_+} (h_{\mathbf{w}}(\mathbf{x}_i) - a)^2 + \frac{1}{n_- \rho} \sum_{\mathbf{x}_j \in \mathcal{D}_-} \phi(h_{\mathbf{w}}(\mathbf{x}_j) - \hat{\lambda}(\mathbf{w}))(h_{\mathbf{w}}(\mathbf{x}_j) - b)^2 \\ & + \max_{\alpha} 2\alpha \left( \frac{1}{n_- \rho} \sum_{\mathbf{x}_j \in \mathcal{D}_-} \phi(h_{\mathbf{w}}(\mathbf{x}_j) - \hat{\lambda}(\mathbf{w}))h_{\mathbf{w}}(\mathbf{x}_j) - \frac{1}{n_+} \sum_{\mathbf{x}_i \in \mathcal{D}_+} h_{\mathbf{w}}(\mathbf{x}_i) + c \right) - \alpha^2 \\ & s.t., \hat{\lambda}(\mathbf{w}) = \arg \min_{\lambda} L(\lambda, \mathbf{w}) := \frac{K + \varepsilon}{n_-} \lambda + \frac{\tau_2}{2} \lambda^2 + \frac{1}{n_-} \sum_{\mathbf{x}_j \in \mathcal{D}_-} \tau_1 \ln(1 + \exp((h_{\mathbf{w}}(\mathbf{x}_j) - \lambda)/\tau_1)) \end{aligned}$$

We consider multi-task partial AUC maximization, which is then given by

$$\begin{aligned} & \min_{\mathbf{w}, \mathbf{a} \in \mathbb{R}^m, \mathbf{b} \in \mathbb{R}^m} \max_{\alpha \in \mathbb{R}^m} \sum_{k=1}^m \left\{ \frac{1}{n_+^k} \sum_{\mathbf{x}_i \in \mathcal{D}_+^k} (h_{\mathbf{w}}(\mathbf{x}_i; k) - a_k)^2 + \frac{1}{n_-^k \rho} \sum_{\mathbf{x}_j \in \mathcal{D}_-^k} \phi(h_{\mathbf{w}}(\mathbf{x}_j; k) - \hat{\lambda}_k(\mathbf{w}))(h_{\mathbf{w}}(\mathbf{x}_j; k) - b_k)^2 \right. \\ & \left. + 2\alpha_k \left( \frac{1}{n_-^k \rho} \sum_{\mathbf{x}_j \in \mathcal{D}_-^k} \phi(h_{\mathbf{w}}(\mathbf{x}_j; k) - \hat{\lambda}_k(\mathbf{w}))h_{\mathbf{w}}(\mathbf{x}_j; k) - \frac{1}{n_+^k} \sum_{\mathbf{x}_i \in \mathcal{D}_+^k} h_{\mathbf{w}}(\mathbf{x}_i; k) + c \right) - \alpha_k^2 \right\} \\ & s.t., \hat{\lambda}_k(\mathbf{w}) = \arg \min_{\lambda} L_k(\lambda, \mathbf{w}) := \frac{K + \varepsilon}{n_-} \lambda + \frac{\tau_2}{2} \lambda^2 + \frac{1}{n_-} \sum_{\mathbf{x}_j \in \mathcal{D}_-^k} \tau_1 \ln(1 + \exp((h_{\mathbf{w}}(\mathbf{x}_j; k) - \lambda)/\tau_1)) \end{aligned}$$

For function  $\phi$ , we use sigmoid function  $\phi(s) = \frac{1}{1 + \exp(-s)} = \sigma(s)$ .  $\nabla \phi(h_{\mathbf{w}}(\mathbf{x}_j; k) - \lambda_k(\mathbf{w})) = \sigma(h_{\mathbf{w}}(\mathbf{x}_j; k) - \lambda_k(\mathbf{w}))(1 - \sigma(h_{\mathbf{w}}(\mathbf{x}_j; k) - \lambda_k(\mathbf{w}))) (\nabla h_{\mathbf{w}}(\mathbf{x}_j; k) - \nabla \lambda_k(\mathbf{w}))$ , where  $\nabla \lambda_k(\mathbf{w}) = -(\nabla_{\lambda\lambda}^2 L_k(\lambda, \mathbf{w}))^{-1} \nabla_{\mathbf{w}\lambda}^2 L_k(\lambda, \mathbf{w})$ . Let  $H_k = (\nabla_{\lambda\lambda}^2 L_k(\lambda, \mathbf{w}))$ , and

$$\begin{aligned} \nabla_{\mathbf{w}\lambda}^2 L_k(\lambda, \mathbf{w}) &= \nabla_{\mathbf{w}} [\nabla_{\lambda} L_k(\lambda, \mathbf{w})] \\ &= \nabla_{\mathbf{w}} \left( \frac{K + \varepsilon}{n_-} + \tau_2 \lambda - \frac{1}{n_-} \sum_{\mathbf{x}_j \in \mathcal{D}_-^k} \frac{\exp((h_{\mathbf{w}}(\mathbf{x}_j; k) - \lambda)/\tau_1)}{1 + \exp((h_{\mathbf{w}}(\mathbf{x}_j; k) - \lambda)/\tau_1)} \right) \\ &= -\frac{1}{n_-} \sum_{\mathbf{x}_j \in \mathcal{D}_-^k} \nabla_{\mathbf{w}} \left( \frac{\exp((h_{\mathbf{w}}(\mathbf{x}_j; k) - \lambda)/\tau_1)}{1 + \exp((h_{\mathbf{w}}(\mathbf{x}_j; k) - \lambda)/\tau_1)} \right) \end{aligned}$$

As a result in order to compute in Pytorch  $\nabla \phi(h_{\mathbf{w}}(\mathbf{x}_j; k) - \lambda(\mathbf{w}))$  we can define the following loss

$$L_{\phi}^k(\mathbf{w}) = st(\sigma(h_{\mathbf{w}}(\mathbf{x}_j; k) - \lambda_k)(1 - \sigma(h_{\mathbf{w}}(\mathbf{x}_j; k) - \lambda_k))). \quad (36)$$

$$\left( h_{\mathbf{w}}(\mathbf{x}_j; k) - st([H_k]^{-1}) \frac{1}{B_-} \sum_{\mathbf{x}_j \in \mathcal{B}_-^k} \frac{\exp((h_{\mathbf{w}}(\mathbf{x}_j; k) - \lambda_k)/\tau_1)}{1 + \exp((h_{\mathbf{w}}(\mathbf{x}_j; k) - \lambda_k)/\tau_1)} \right) \quad (37)$$

so that  $\nabla L_\phi^k(\mathbf{w}) = \nabla \phi(h_{\mathbf{w}}(\mathbf{x}_j; k) - \lambda(\mathbf{w}))$ . Hence for updating  $\mathbf{w}, \mathbf{a}, \mathbf{b}$  we can define the following loss and the Pytorch will compute the gradient automatically:

$$\begin{aligned}
G^{t+1} := & \frac{1}{|I_t|} \sum_{k \in I_t} \left\{ \frac{1}{B_+^k} \sum_{\mathbf{x}_i \in \mathcal{B}_+^k} (h_{\mathbf{w}}(\mathbf{x}_i; k) - a_k)^2 + \frac{1}{B_-^k \rho} \sum_{\mathbf{x}_j \in \mathcal{B}_-^k} st(\phi(h_{\mathbf{w}}(\mathbf{x}_j; k) - \lambda_k))(h_{\mathbf{w}}(\mathbf{x}_j; k) - b_k)^2 \right. \\
& + \frac{1}{B_-^k \rho} \sum_{\mathbf{x}_j \in \mathcal{B}_-^k} L_\phi^k(\mathbf{w}) st((h_{\mathbf{w}}(\mathbf{x}_j; k) - b_k)^2) + 2\alpha_k \left( \frac{1}{B_-^k \rho} \sum_{\mathbf{x}_j \in \mathcal{B}_-^k} st(\phi(h_{\mathbf{w}}(\mathbf{x}_j; k) - \lambda_k)) h_{\mathbf{w}}(\mathbf{x}_j; k) \right. \\
& \left. \left. + \frac{1}{B_-^k \rho} \sum_{\mathbf{x}_j \in \mathcal{B}_-^k} L_\phi^k(\mathbf{w}) st(h_{\mathbf{w}}(\mathbf{x}_j; k)) - \frac{1}{B_+^k} \sum_{\mathbf{x}_i \in \mathcal{B}_+^k} h_{\mathbf{w}}(\mathbf{x}_i; k) + c \right) \right\}
\end{aligned} \tag{38}$$

The loss for  $\alpha_k, \lambda_k$  and  $H_k$  in the mini-batch for computing the gradient can be easily defined. For practical version the terms that involve  $L_\phi^k(\mathbf{w})$  can be ignored.

## D Additional Experiments

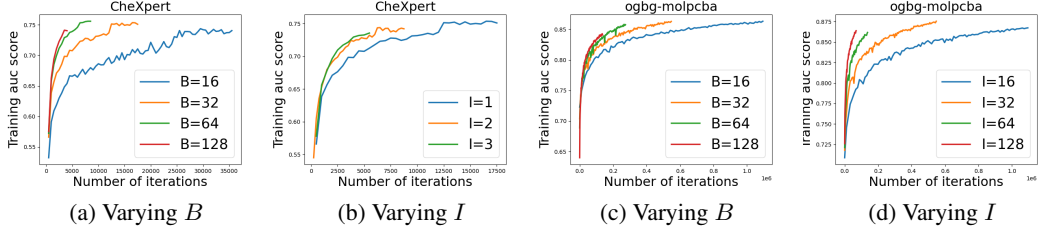

Figure 3: Convergence of our method vs data sample batch sizes  $B$  and vs task sample batch size  $I := |I_t|$  for multi-task deep AUC maximization.

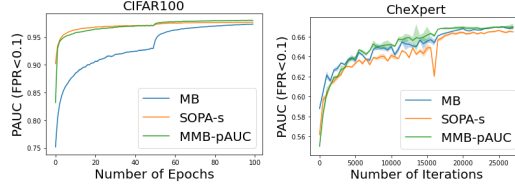

Figure 4: Comparison of Convergence on training data for multi-task deep pAUC maximization on the CIFAR100 and CheXpert datasets.
